# Supplementary material for: Investigating the reactivity of a Lewis base-supported terminal uranium imido metallocene
Source: Royal Society of Chemistry journal article supplement (doi:10.1039/d3qi02650g), 2024-01-01
Supplement: d3qi02650g1.pdf [file d3qi02650g1.pdf]

*Supporting Information for*

# Investigating the reactivity of a Lewis base supported terminal uranium imido metallocene

Yi Heng,<sup>a</sup> Tongyu Li,<sup>a</sup> Dongwei Wang,<sup>a</sup> Guofu Zi,<sup>\*,a</sup> and Marc D. Walter<sup>\*,b</sup>

<sup>a</sup>Department of Chemistry, Beijing Normal University, Beijing 100875, China

<sup>b</sup>Institut für Anorganische und Analytische Chemie, Technische Universität Braunschweig, Hagenring 30,  
38106 Braunschweig, Germany

\*Corresponding authors. E-mail: [gzi@bnu.edu.cn](mailto:gzi@bnu.edu.cn), [mwalter@tu-bs.de](mailto:mwalter@tu-bs.de)

## Table of contents

|                             |     |
|-----------------------------|-----|
| 1. Figures                  | S2  |
| 2. Crystallographic details | S3  |
| 3. NMR spectra              | S6  |
| 4. UV-vis-NIR spectra       | S26 |

## 1. Figures

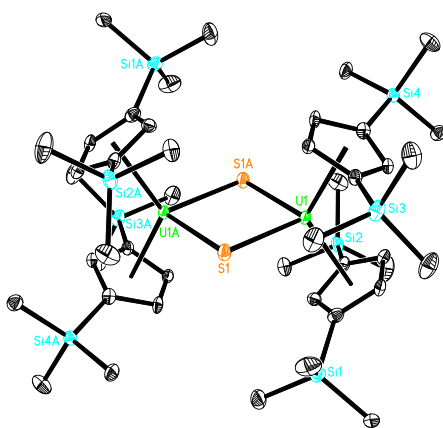

**Figure S1.** Molecular structure of **5** (thermal ellipsoids drawn at the 35% probability level). Selected bond lengths (Å) and angles (°): U-C(Cp) (av.) 2.748(25), U-C(Cp) (range) 2.716(7) to 2.781(7), U-Cp (cent) 2.464(7) and 2.475(7), U-S(1) 2.592(2), U-S(1A) 2.600(2), Cp(cent)-U-Cp(cent) 123.8(2), S(1)-U-S(1A) 84.5(1).

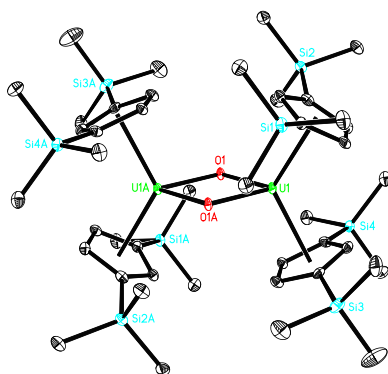

**Figure S2.** Molecular structure of **6** (thermal ellipsoids drawn at the 35% probability level). Selected bond lengths (Å) and angles (°): U-C(Cp) (av.) 2.783(27), U-C(Cp) (range) 2.739(6) to 2.819(6), U-Cp (cent) 2.506(6) and 2.506(6), U-O(1) 2.115(3), U-O(1A) 2.124(4), Cp(cent)-U-Cp(cent) 123.4(2), O(1)-U-O(1A) 74.7(2).

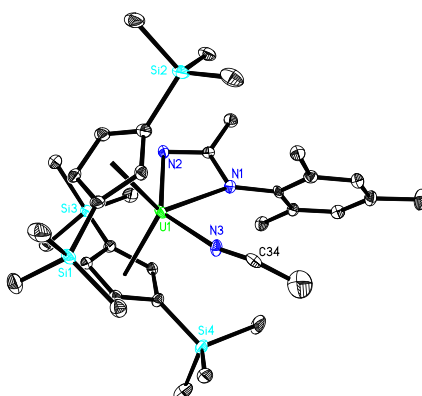

**Figure S3.** Molecular structure of **10** (thermal ellipsoids drawn at the 35% probability level).

## 2. Crystallographic details

**Table S1. Crystal Data and Experimental Parameters for Compounds 2-6**

| Compound                                                      | <b>2</b>                                                         | <b>3</b>                                           | <b>4·C<sub>6</sub>H<sub>6</sub></b>                                             | <b>5</b>                                                                      | <b>6</b>                                                                      |
|---------------------------------------------------------------|------------------------------------------------------------------|----------------------------------------------------|---------------------------------------------------------------------------------|-------------------------------------------------------------------------------|-------------------------------------------------------------------------------|
| Formula                                                       | C <sub>38</sub> H <sub>63</sub> N <sub>3</sub> Si <sub>4</sub> U | C <sub>47</sub> H <sub>65</sub> NSi <sub>4</sub> U | C <sub>48</sub> H <sub>68</sub> N <sub>2</sub> S <sub>2</sub> Si <sub>4</sub> U | C <sub>44</sub> H <sub>84</sub> S <sub>2</sub> Si <sub>8</sub> U <sub>2</sub> | C <sub>44</sub> H <sub>84</sub> O <sub>2</sub> Si <sub>8</sub> U <sub>2</sub> |
| Fw                                                            | 912.30                                                           | 994.39                                             | 1087.55                                                                         | 1378.01                                                                       | 1345.89                                                                       |
| crystal system                                                | monoclinic                                                       | monoclinic                                         | monoclinic                                                                      | triclinic                                                                     | monoclinic                                                                    |
| space group                                                   | <i>P</i> 2 <sub>1</sub> / <i>c</i>                               | <i>P</i> 2 <sub>1</sub> / <i>c</i>                 | <i>I</i> 2/ <i>a</i>                                                            | <i>P</i> $\bar{1}$                                                            | <i>P</i> 2 <sub>1</sub> / <i>n</i>                                            |
| <i>a</i> (Å)                                                  | 10.135(1)                                                        | 11.673(1)                                          | 21.876(1)                                                                       | 10.537(1)                                                                     | 11.985(1)                                                                     |
| <i>b</i> (Å)                                                  | 21.161(1)                                                        | 39.848(1)                                          | 12.702(1)                                                                       | 11.547(1)                                                                     | 15.810(1)                                                                     |
| <i>c</i> (Å)                                                  | 20.430(1)                                                        | 11.490(1)                                          | 38.216(1)                                                                       | 12.874(1)                                                                     | 15.473(1)                                                                     |
| $\alpha$ (deg)                                                | 90                                                               | 90                                                 | 90                                                                              | 74.13(1)                                                                      | 90                                                                            |
| $\beta$ (deg)                                                 | 100.05(1)                                                        | 115.37(1)                                          | 105.03(1)                                                                       | 84.45(1)                                                                      | 100.52(1)                                                                     |
| $\gamma$ (deg)                                                | 90                                                               | 90                                                 | 90                                                                              | 76.59(1)                                                                      | 90                                                                            |
| <i>V</i> (Å <sup>3</sup> )                                    | 4314.25(7)                                                       | 4829.2(4)                                          | 10256.0(4)                                                                      | 1464.62(7)                                                                    | 2882.44(9)                                                                    |
| <i>Z</i>                                                      | 4                                                                | 4                                                  | 8                                                                               | 1                                                                             | 2                                                                             |
| <i>D</i> <sub>calc</sub> (g/cm <sup>3</sup> )                 | 1.405                                                            | 1.368                                              | 1.409                                                                           | 1.562                                                                         | 1.551                                                                         |
| $\mu$ (Mo/K $\alpha$ ) <sub>calc</sub> (cm <sup>-1</sup> )    | 11.854                                                           | 10.629                                             | 10.805                                                                          | 17.869                                                                        | 17.511                                                                        |
| size (mm)                                                     | 0.15 × 0.10 × 0.10                                               | 0.15 × 0.15 × 0.15                                 | 0.20 × 0.20 × 0.20                                                              | 0.10 × 0.10 × 0.10                                                            | 0.15 × 0.10 × 0.10                                                            |
| <i>F</i> (000)                                                | 1840                                                             | 2008                                               | 4400                                                                            | 676                                                                           | 1320                                                                          |
| 2 $\theta$ range (deg)                                        | 6.06 to 151.65                                                   | 8.38 to 152.88                                     | 7.36 to 153.03                                                                  | 7.14 to 152.94                                                                | 8.07 to 152.68                                                                |
| no. of reflns,<br>collected                                   | 31986                                                            | 34122                                              | 32730                                                                           | 17410                                                                         | 19746                                                                         |
| no of obsd reflns                                             | 8628                                                             | 9679                                               | 10246                                                                           | 5879                                                                          | 5758                                                                          |
| no of variables                                               | 432                                                              | 493                                                | 528                                                                             | 265                                                                           | 266                                                                           |
| abscorr ( <i>T</i> <sub>max</sub> , <i>T</i> <sub>min</sub> ) | 1.00, 0.69                                                       | 1.00, 0.63                                         | 1.00, 0.69                                                                      | 1.00, 0.51                                                                    | 1.00, 0.53                                                                    |
| <i>R</i>                                                      | 0.026                                                            | 0.043                                              | 0.038                                                                           | 0.041                                                                         | 0.044                                                                         |
| <i>R</i> <sub>w</sub>                                         | 0.060                                                            | 0.101                                              | 0.101                                                                           | 0.108                                                                         | 0.120                                                                         |
| <i>R</i> <sub>all</sub>                                       | 0.030                                                            | 0.057                                              | 0.041                                                                           | 0.043                                                                         | 0.046                                                                         |
| Gof                                                           | 1.04                                                             | 1.10                                               | 1.04                                                                            | 1.09                                                                          | 1.06                                                                          |
| CCDC                                                          | 2307461                                                          | 2307462                                            | 2307467                                                                         | 2307458                                                                       | 2307459                                                                       |

**Table S2. Crystal Data and Experimental Parameters for Compounds 7-9,11**

| Compound                                                      | <b>7</b>                                                                        | <b>8</b>                                                                         | <b>9</b>                                                         | <b>11</b>                                                        |
|---------------------------------------------------------------|---------------------------------------------------------------------------------|----------------------------------------------------------------------------------|------------------------------------------------------------------|------------------------------------------------------------------|
| Formula                                                       | C <sub>50</sub> H <sub>66</sub> N <sub>2</sub> O <sub>2</sub> Si <sub>4</sub> U | C <sub>43</sub> H <sub>61</sub> B <sub>2</sub> NO <sub>4</sub> Si <sub>4</sub> U | C <sub>47</sub> H <sub>67</sub> N <sub>3</sub> Si <sub>4</sub> U | C <sub>44</sub> H <sub>61</sub> N <sub>8</sub> Si <sub>2</sub> U |
| Fw                                                            | 1077.43                                                                         | 1027.93                                                                          | 1024.42                                                          | 996.21                                                           |
| crystal system                                                | monoclinic                                                                      | monoclinic                                                                       | triclinic                                                        | triclinic                                                        |
| space group                                                   | <i>P2<sub>1</sub>/n</i>                                                         | <i>P2<sub>1</sub>/c</i>                                                          | <i>P<math>\bar{1}</math></i>                                     | <i>P<math>\bar{1}</math></i>                                     |
| <i>a</i> (Å)                                                  | 12.121(1)                                                                       | 22.148(1)                                                                        | 19.529(1)                                                        | 10.826(1)                                                        |
| <i>b</i> (Å)                                                  | 10.631(1)                                                                       | 19.950(1)                                                                        | 19.612(1)                                                        | 11.954(1)                                                        |
| <i>c</i> (Å)                                                  | 19.805(1)                                                                       | 32.623(1)                                                                        | 27.013(2)                                                        | 19.175(1)                                                        |
| $\alpha$ (deg)                                                | 90                                                                              | 90                                                                               | 76.69(1)                                                         | 86.16(1)                                                         |
| $\beta$ (deg)                                                 | 97.79(1)                                                                        | 96.17(1)                                                                         | 88.48(1)                                                         | 76.77(1)                                                         |
| $\gamma$ (deg)                                                | 90                                                                              | 90                                                                               | 81.98(1)                                                         | 87.17(1)                                                         |
| <i>V</i> (Å <sup>3</sup> )                                    | 2528.47(3)                                                                      | 14331.5(3)                                                                       | 9969.32(17)                                                      | 2408.66(7)                                                       |
| <i>Z</i>                                                      | 2                                                                               | 12                                                                               | 8                                                                | 2                                                                |
| <i>D</i> <sub>calc</sub> (g/cm <sup>3</sup> )                 | 1.415                                                                           | 1.429                                                                            | 1.365                                                            | 1.374                                                            |
| $\mu$ (Mo/K $\alpha$ ) <sub>calc</sub> (cm <sup>-1</sup> )    | 10.233                                                                          | 10.823                                                                           | 10.325                                                           | 10.240                                                           |
| size (mm)                                                     | 0.15 × 0.10 × 0.10                                                              | 0.20 × 0.20 × 0.20                                                               | 0.15 × 0.15 × 0.15                                               | 0.20 × 0.20 × 0.20                                               |
| <i>F</i> (000)                                                | 1088                                                                            | 6192                                                                             | 4144                                                             | 1002                                                             |
| 2 $\theta$ range (deg)                                        | 8.09 to 153.11                                                                  | 6.41 to 153.16                                                                   | 6.42 to 153.02                                                   | 7.42 to 152.99                                                   |
| no. of reflns, collected                                      | 17995                                                                           | 107081                                                                           | 135102                                                           | 33834                                                            |
| no of obsd reflns                                             | 5086                                                                            | 28921                                                                            | 40160                                                            | 9634                                                             |
| no of variables                                               | 274                                                                             | 1531                                                                             | 2041                                                             | 508                                                              |
| abscorr ( <i>T</i> <sub>max</sub> , <i>T</i> <sub>min</sub> ) | 1.00, 0.70                                                                      | 1.00, 0.14                                                                       | 1.00, 0.39                                                       | 1.00, 0.78                                                       |
| <i>R</i>                                                      | 0.031                                                                           | 0.061                                                                            | 0.057                                                            | 0.037                                                            |
| <i>R</i> <sub>w</sub>                                         | 0.078                                                                           | 0.169                                                                            | 0.135                                                            | 0.094                                                            |
| <i>R</i> <sub>all</sub>                                       | 0.033                                                                           | 0.099                                                                            | 0.076                                                            | 0.040                                                            |
| Gof                                                           | 1.05                                                                            | 1.05                                                                             | 1.06                                                             | 1.07                                                             |
| CCDC                                                          | 2307460                                                                         | 2307463                                                                          | 2307469                                                          | 2307464                                                          |

**Table S3. Crystal Data and Experimental Parameters for Compounds 12-14,16**

| Compound                                                      | <b>12</b>                                           | <b>13</b>                                           | <b>14</b>                                            | <b>16</b>                                                        |
|---------------------------------------------------------------|-----------------------------------------------------|-----------------------------------------------------|------------------------------------------------------|------------------------------------------------------------------|
| Formula                                                       | C <sub>31</sub> H <sub>53</sub> INSi <sub>4</sub> U | C <sub>37</sub> H <sub>58</sub> NSSi <sub>4</sub> U | C <sub>37</sub> H <sub>58</sub> NSeSi <sub>4</sub> U | C <sub>40</sub> H <sub>64</sub> N <sub>2</sub> Si <sub>4</sub> U |
| Fw                                                            | 917.03                                              | 899.29                                              | 946.19                                               | 923.32                                                           |
| crystal system                                                | triclinic                                           | triclinic                                           | triclinic                                            | triclinic                                                        |
| space group                                                   | <i>P</i> $\bar{1}$                                  | <i>P</i> $\bar{1}$                                  | <i>P</i> $\bar{1}$                                   | <i>P</i> $\bar{1}$                                               |
| <i>a</i> (Å)                                                  | 10.743(1)                                           | 10.068(1)                                           | 10.068(1)                                            | 11.804(1)                                                        |
| <i>b</i> (Å)                                                  | 11.412(1)                                           | 10.825(1)                                           | 10.840(1)                                            | 12.224(1)                                                        |
| <i>c</i> (Å)                                                  | 16.434(1)                                           | 21.699(1)                                           | 21.791(1)                                            | 15.701(1)                                                        |
| $\alpha$ (deg)                                                | 77.71(1)                                            | 75.82(1)                                            | 79.67(1)                                             | 72.92(1)                                                         |
| $\beta$ (deg)                                                 | 72.61(1)                                            | 86.69(1)                                            | 78.95(1)                                             | 88.34(1)                                                         |
| $\gamma$ (deg)                                                | 82.39(1)                                            | 64.54(1)                                            | 64.65(1)                                             | 84.16(1)                                                         |
| <i>V</i> (Å <sup>3</sup> )                                    | 1873.45(12)                                         | 2067.35(9)                                          | 2096.62(15)                                          | 2154.34(5)                                                       |
| <i>Z</i>                                                      | 2                                                   | 2                                                   | 2                                                    | 2                                                                |
| <i>D</i> <sub>calc</sub> (g/cm <sup>3</sup> )                 | 1.626                                               | 1.445                                               | 1.499                                                | 1.423                                                            |
| $\mu$ (Mo/K $\alpha$ ) <sub>calc</sub> (cm <sup>-1</sup> )    | 5.303                                               | 12.807                                              | 4.878                                                | 11.870                                                           |
| size (mm)                                                     | 0.20 × 0.20 × 0.20                                  | 0.20 × 0.15 × 0.15                                  | 0.20 × 0.20 × 0.20                                   | 0.15 × 0.15 × 0.15                                               |
| <i>F</i> (000)                                                | 894                                                 | 902                                                 | 938                                                  | 932                                                              |
| 2 $\theta$ range (deg)                                        | 6.96 to 59.59                                       | 8.42 to 152.64                                      | 6.60 to 59.54                                        | 7.53 to 152.79                                                   |
| no. of reflns, collected                                      | 17108                                               | 26074                                               | 19698                                                | 28531                                                            |
| no of obsd reflns                                             | 8836                                                | 8249                                                | 9880                                                 | 8670                                                             |
| no of variables                                               | 358                                                 | 412                                                 | 412                                                  | 442                                                              |
| abscorr ( <i>T</i> <sub>max</sub> , <i>T</i> <sub>min</sub> ) | 1.00, 0.73                                          | 1.00, 0.62                                          | 1.00, 0.83                                           | 1.00, 0.67                                                       |
| <i>R</i>                                                      | 0.047                                               | 0.043                                               | 0.046                                                | 0.042                                                            |
| <i>R</i> <sub>w</sub>                                         | 0.088                                               | 0.117                                               | 0.080                                                | 0.111                                                            |
| <i>R</i> <sub>all</sub>                                       | 0.059                                               | 0.045                                               | 0.059                                                | 0.044                                                            |
| Gof                                                           | 0.94                                                | 1.07                                                | 0.92                                                 | 1.07                                                             |
| CCDC                                                          | 2307468                                             | 2307470                                             | 2307466                                              | 2307465                                                          |

### 3. NMR spectra

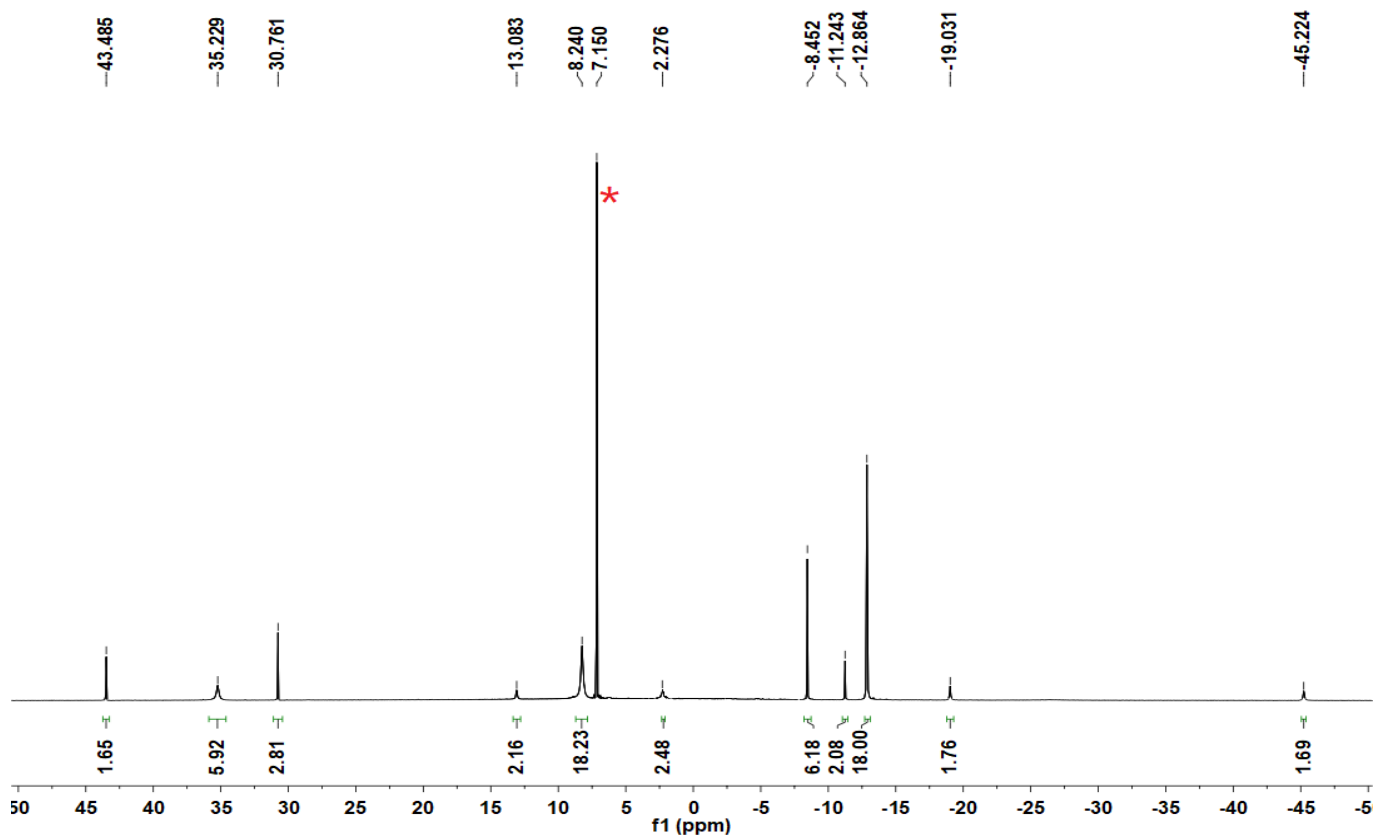

Figure S4.  $^1\text{H}$  NMR spectrum for compound **2** (\* solvent).

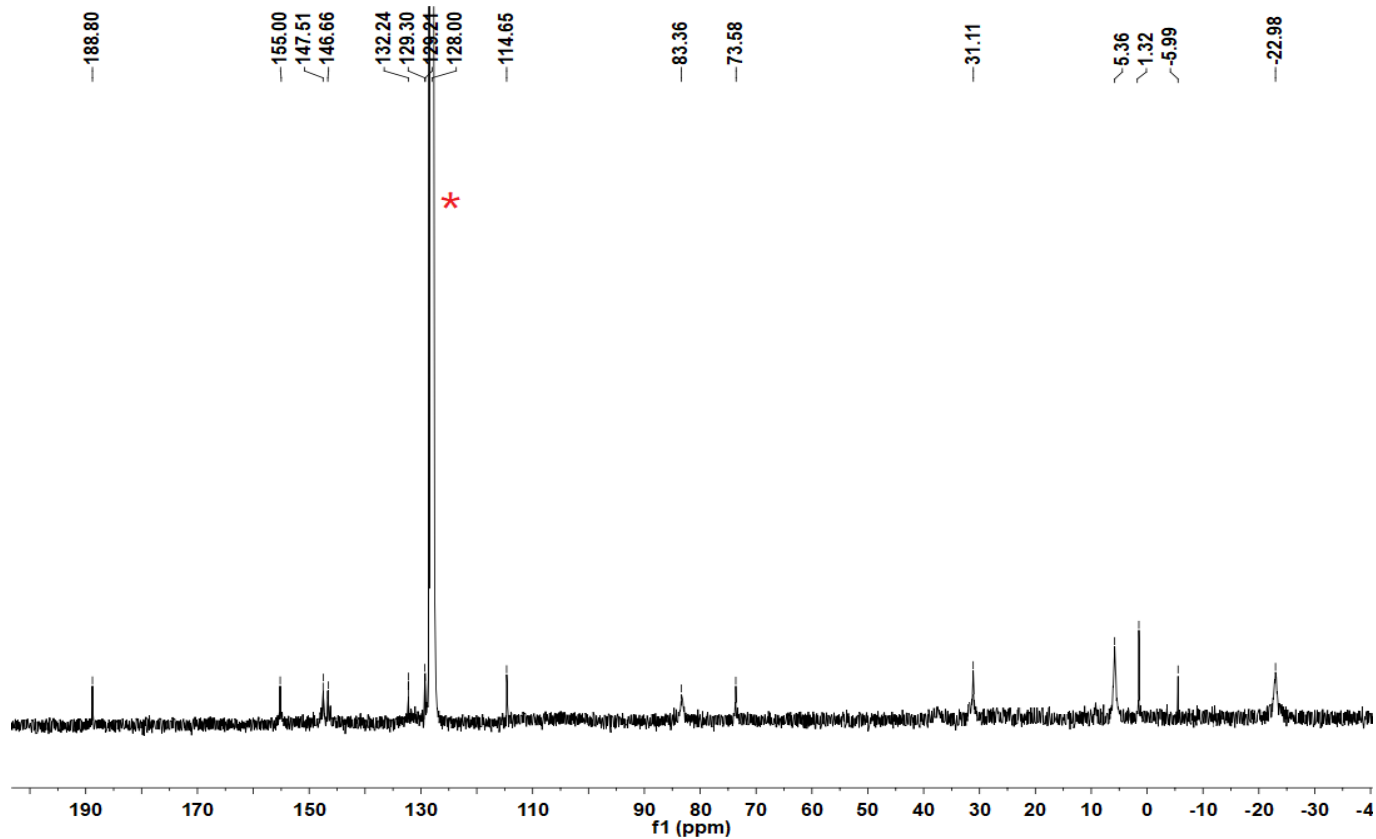

Figure S5.  $^{13}\text{C}\{^1\text{H}\}$  NMR spectrum for compound **2** (\* solvent).

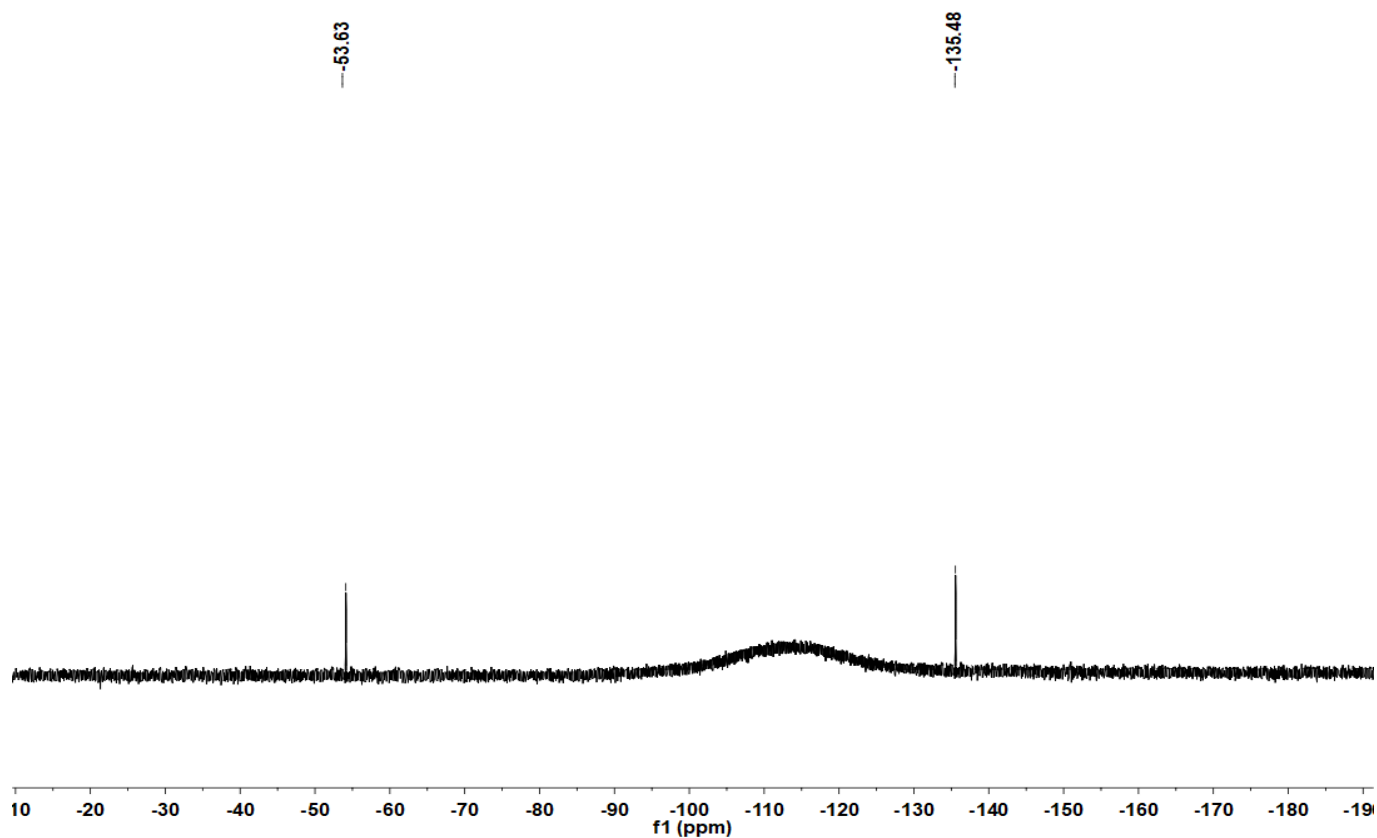

Figure S6.  $^{29}\text{Si}\{^1\text{H}\}$  NMR spectrum for compound **2** (\* solvent).

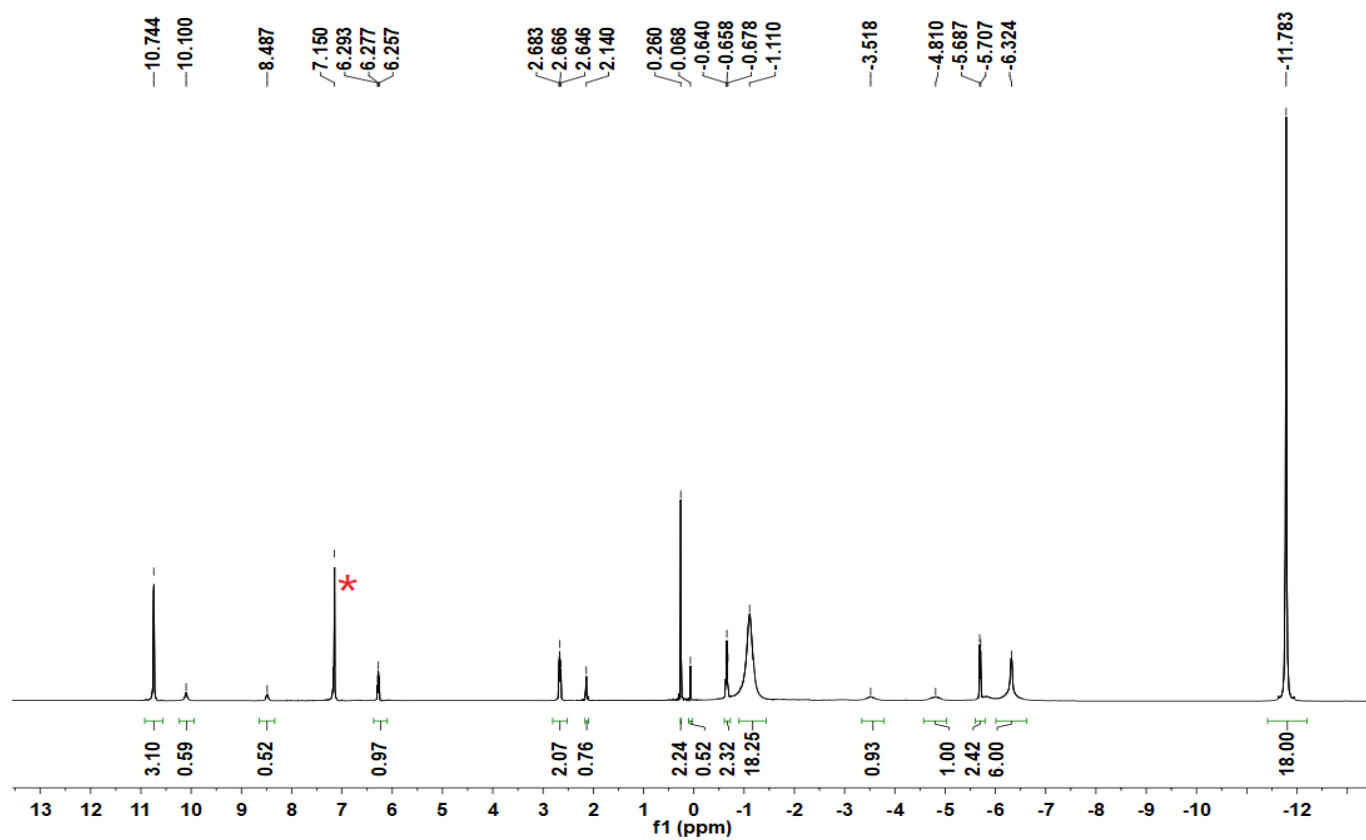

Figure S7.  $^1\text{H}$  NMR spectrum for compound **3** (\* solvent).

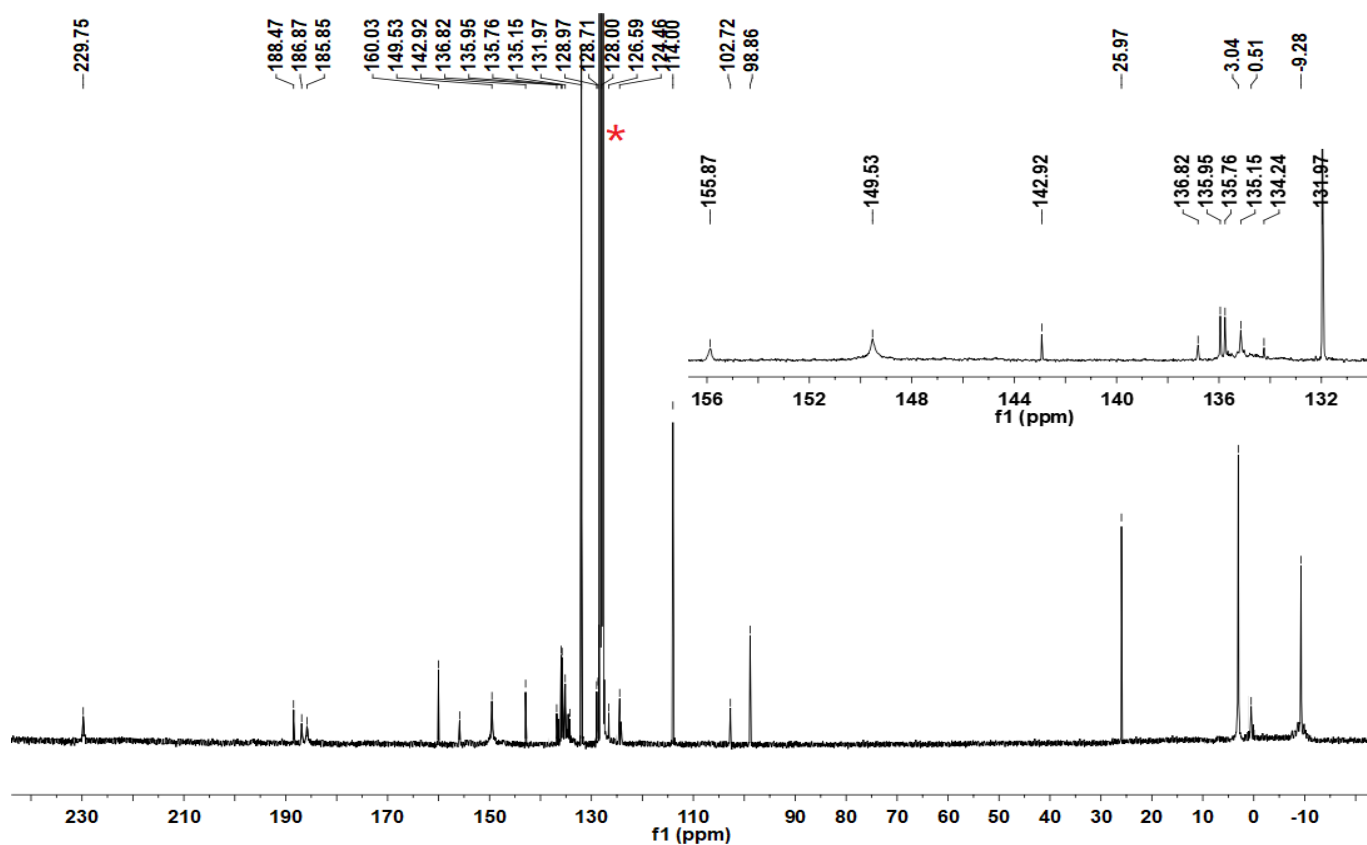

Figure S8.  $^{13}\text{C}\{^1\text{H}\}$  NMR spectrum for compound **3** (\* solvent).

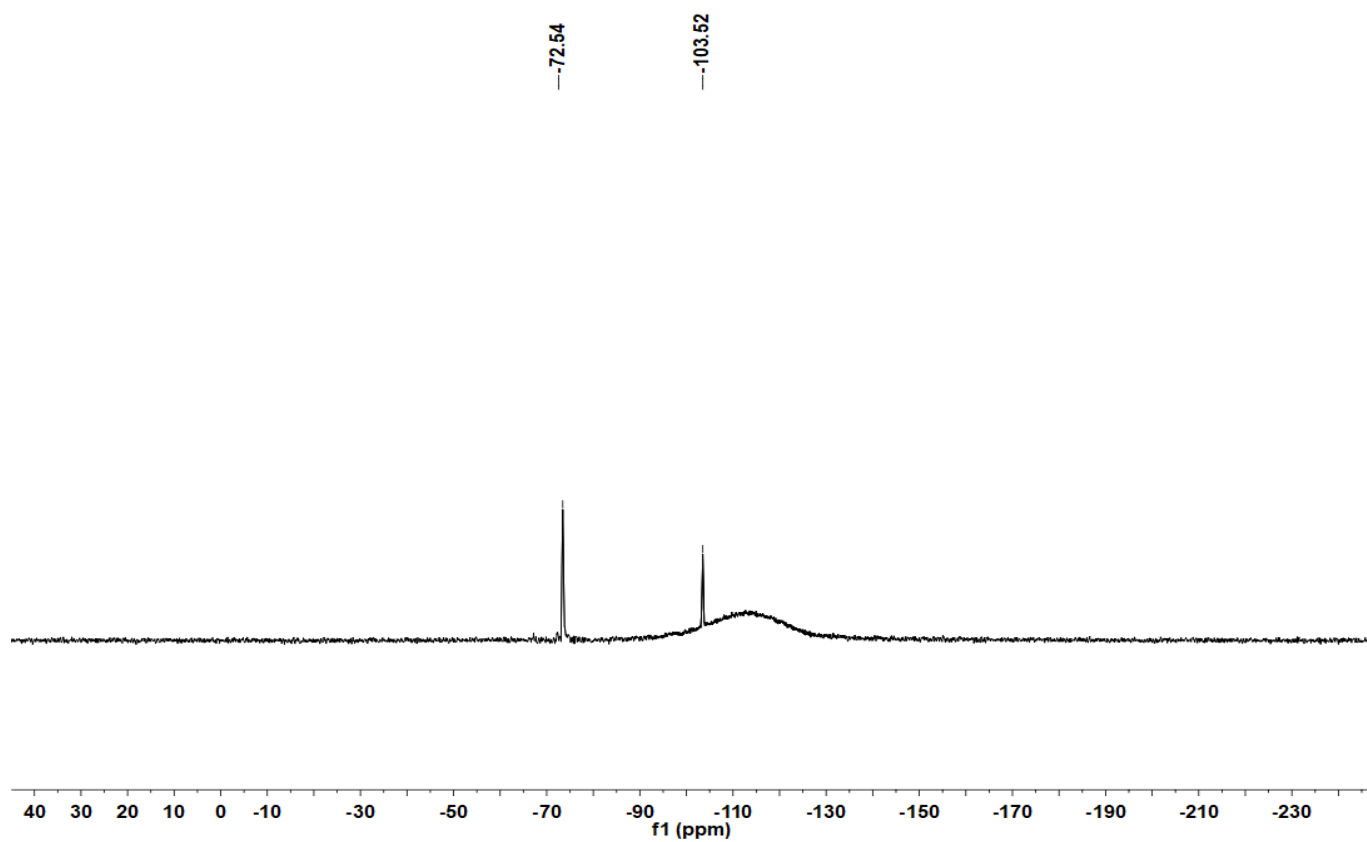

Figure S9.  $^{29}\text{Si}\{^1\text{H}\}$  NMR spectrum for compound **3** (\* solvent).



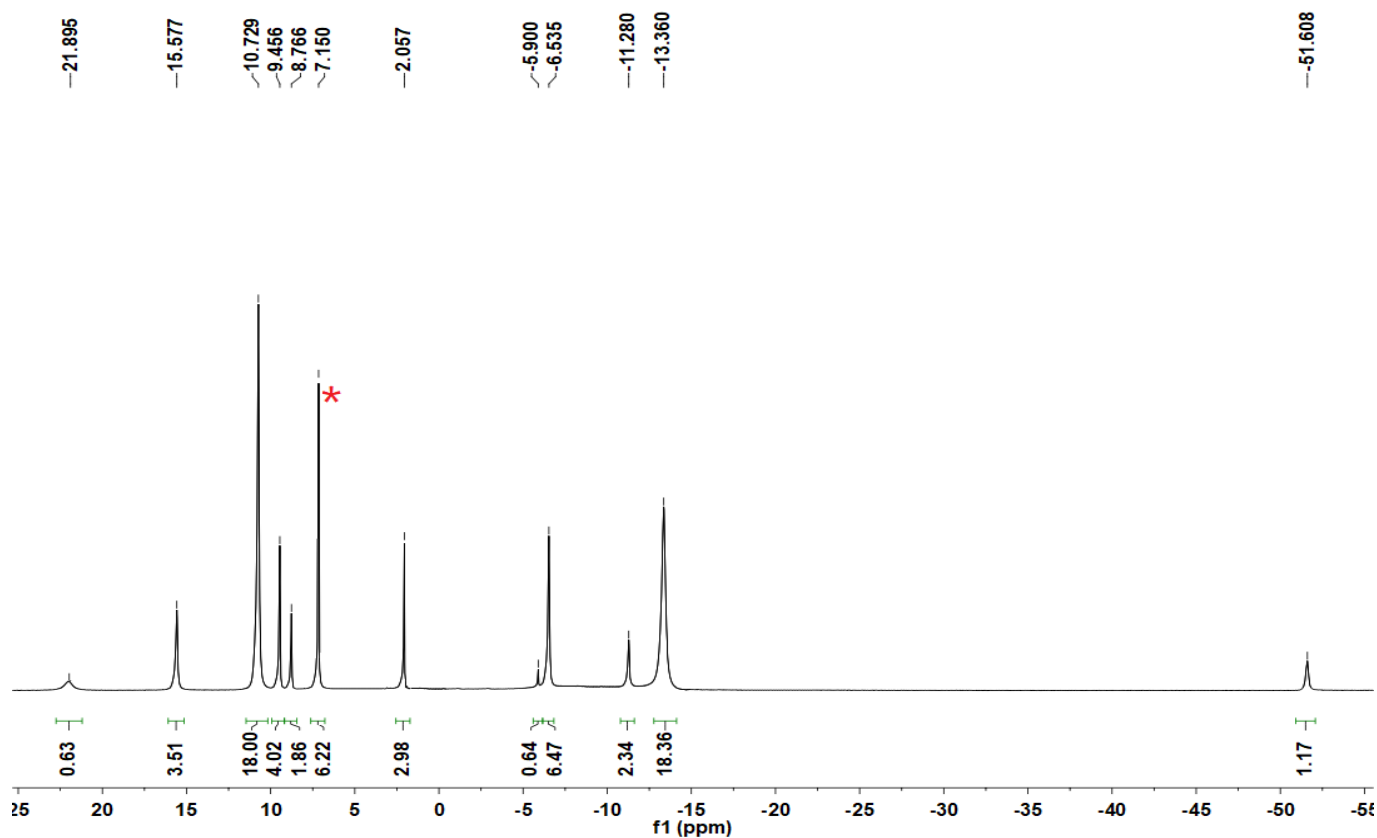

Figure S10.  $^1\text{H}$  NMR spectrum for compound 4 (\* solvent).

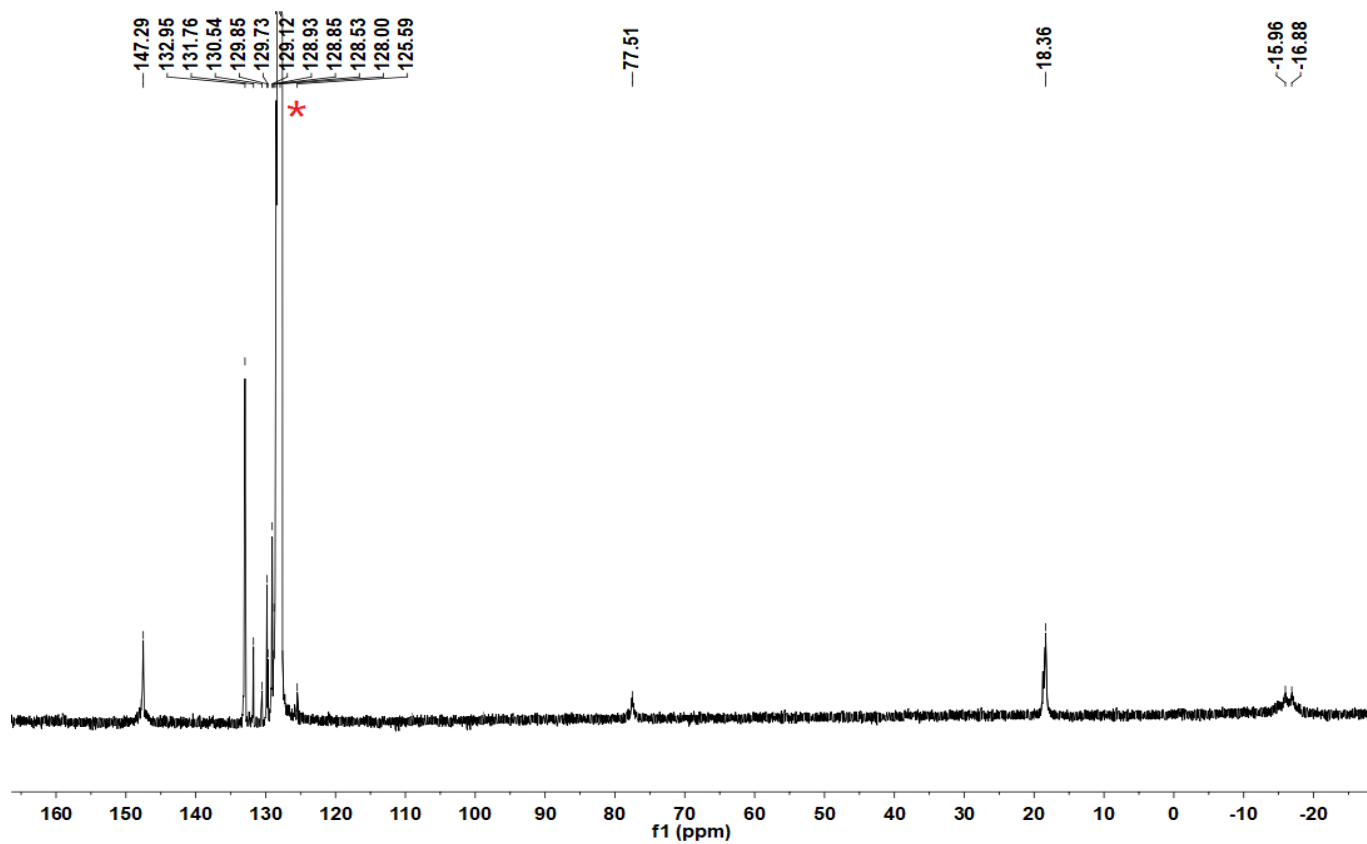

Figure S11.  $^{13}\text{C}\{^1\text{H}\}$  NMR spectrum for compound 4 (\* solvent).

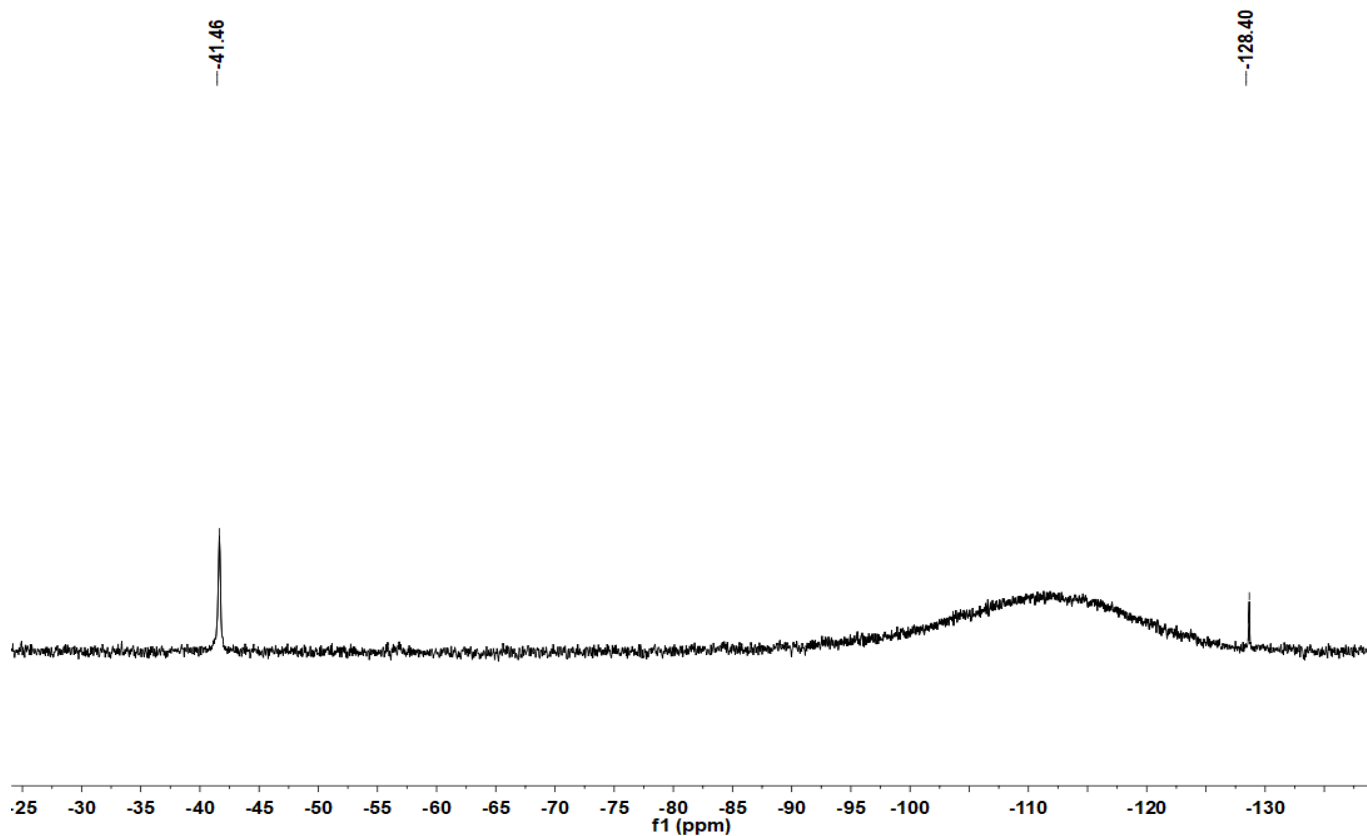

Figure S12.  $^{29}\text{Si}\{^1\text{H}\}$  NMR spectrum for compound 4 (\* solvent).

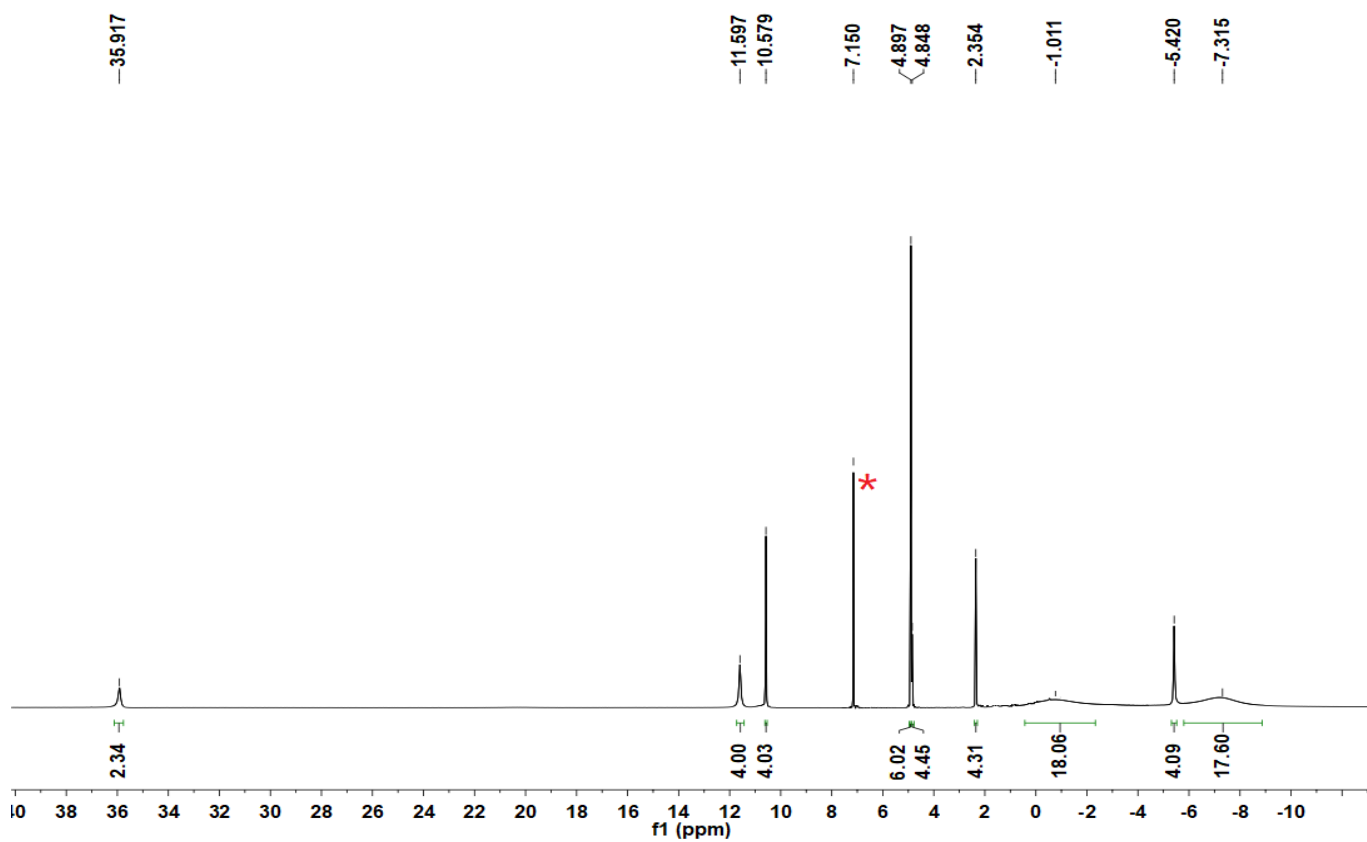

Figure S13.  $^1\text{H}$  NMR spectrum for compound 7 (\* solvent).

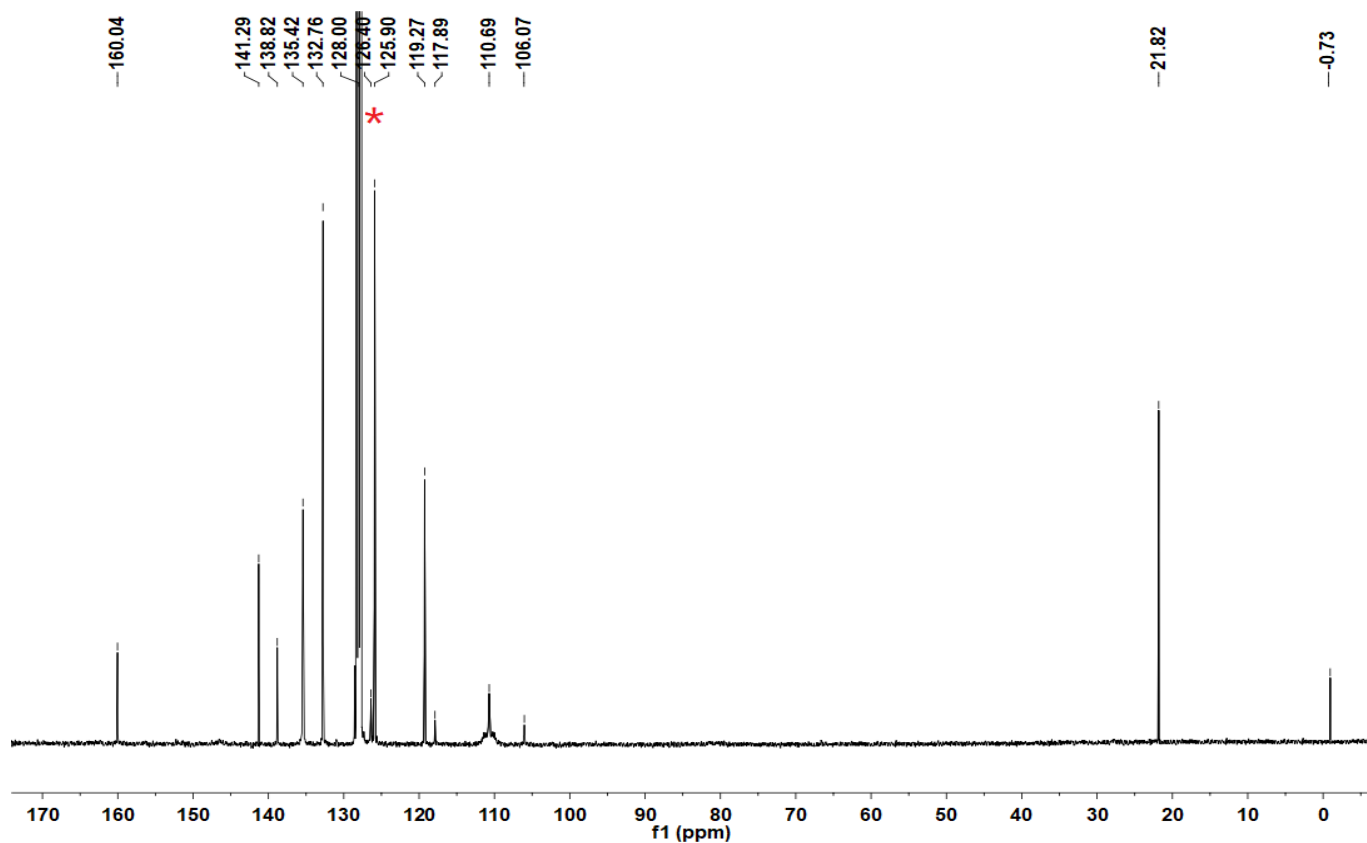

Figure S14.  $^{13}\text{C}\{^1\text{H}\}$  NMR spectrum for compound **7** (\* solvent).

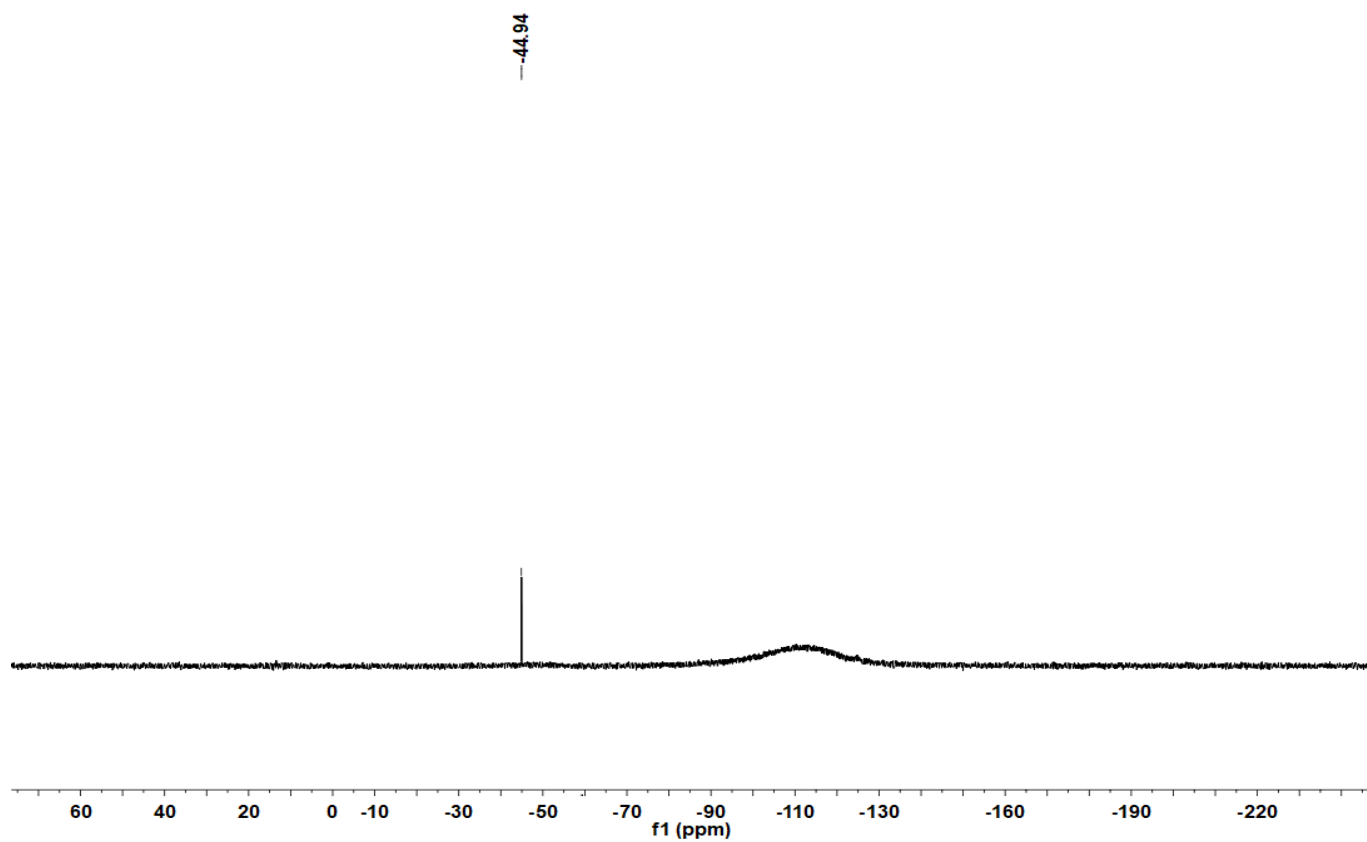

Figure S15.  $^{29}\text{Si}\{^1\text{H}\}$  NMR spectrum for compound **7** (\* solvent).

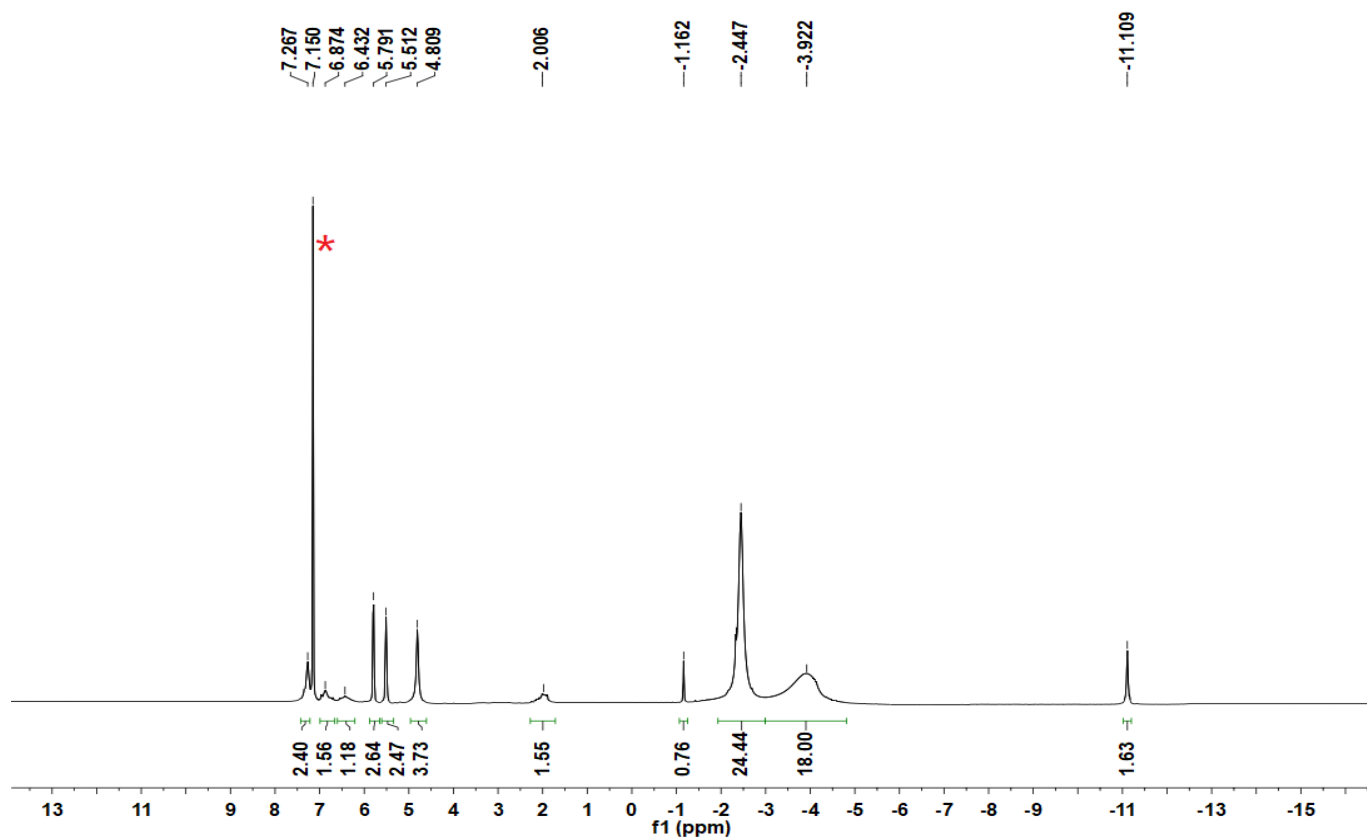

Figure S16.  $^1\text{H}$  NMR spectrum for compound **8** (\* solvent).

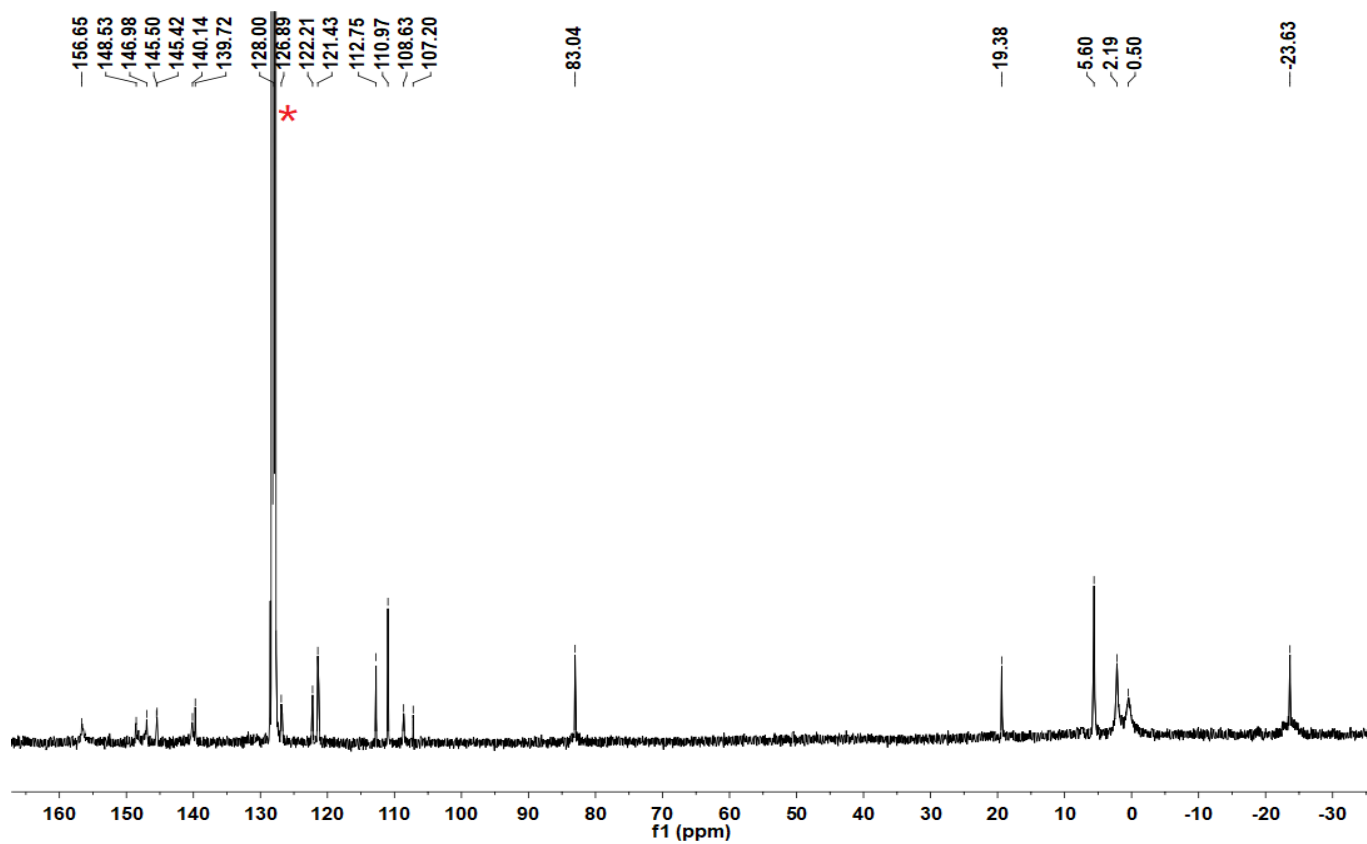

Figure S17.  $^{13}\text{C}\{^1\text{H}\}$  NMR spectrum for compound **8** (\* solvent).

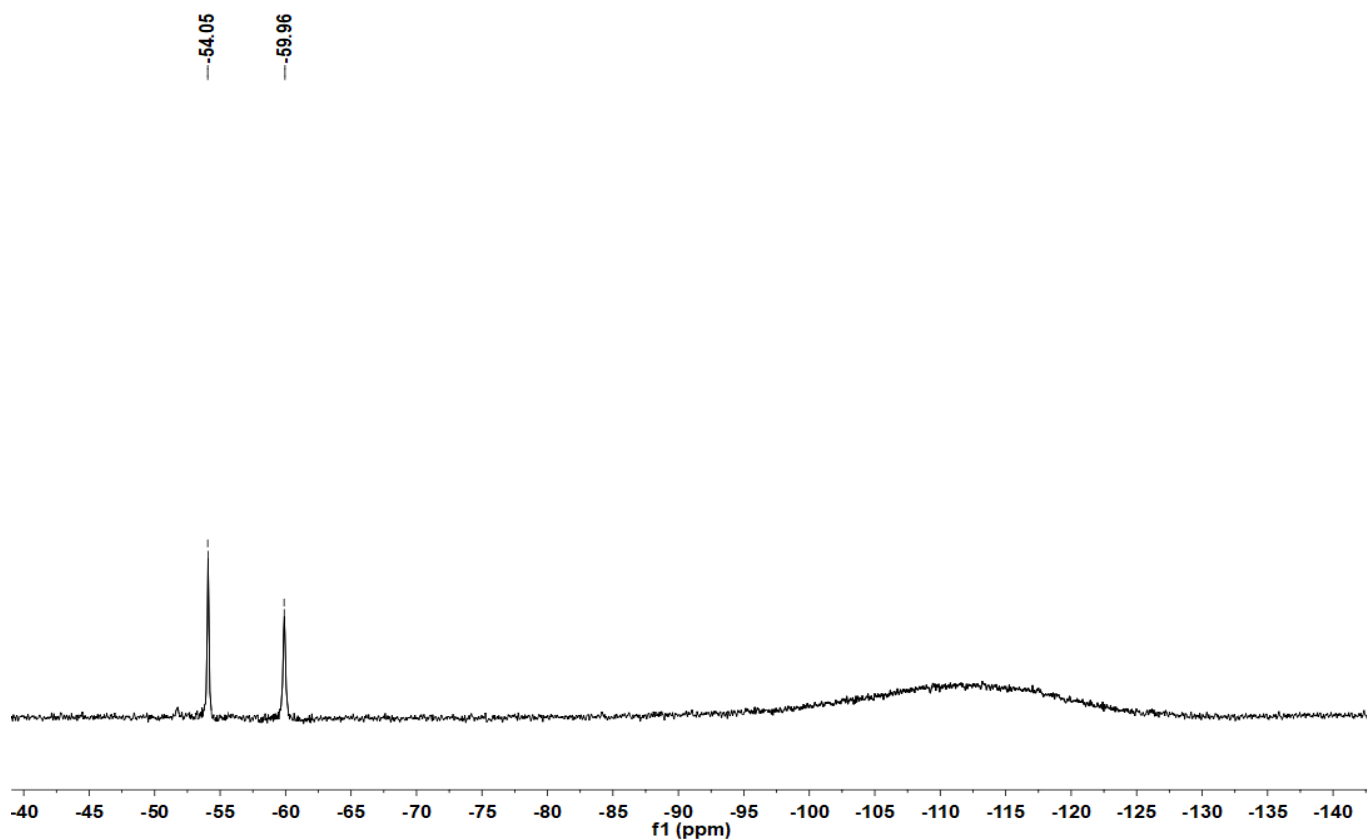

Figure S18.  $^{29}\text{Si}\{^1\text{H}\}$  NMR spectrum for compound **8** (\* solvent).

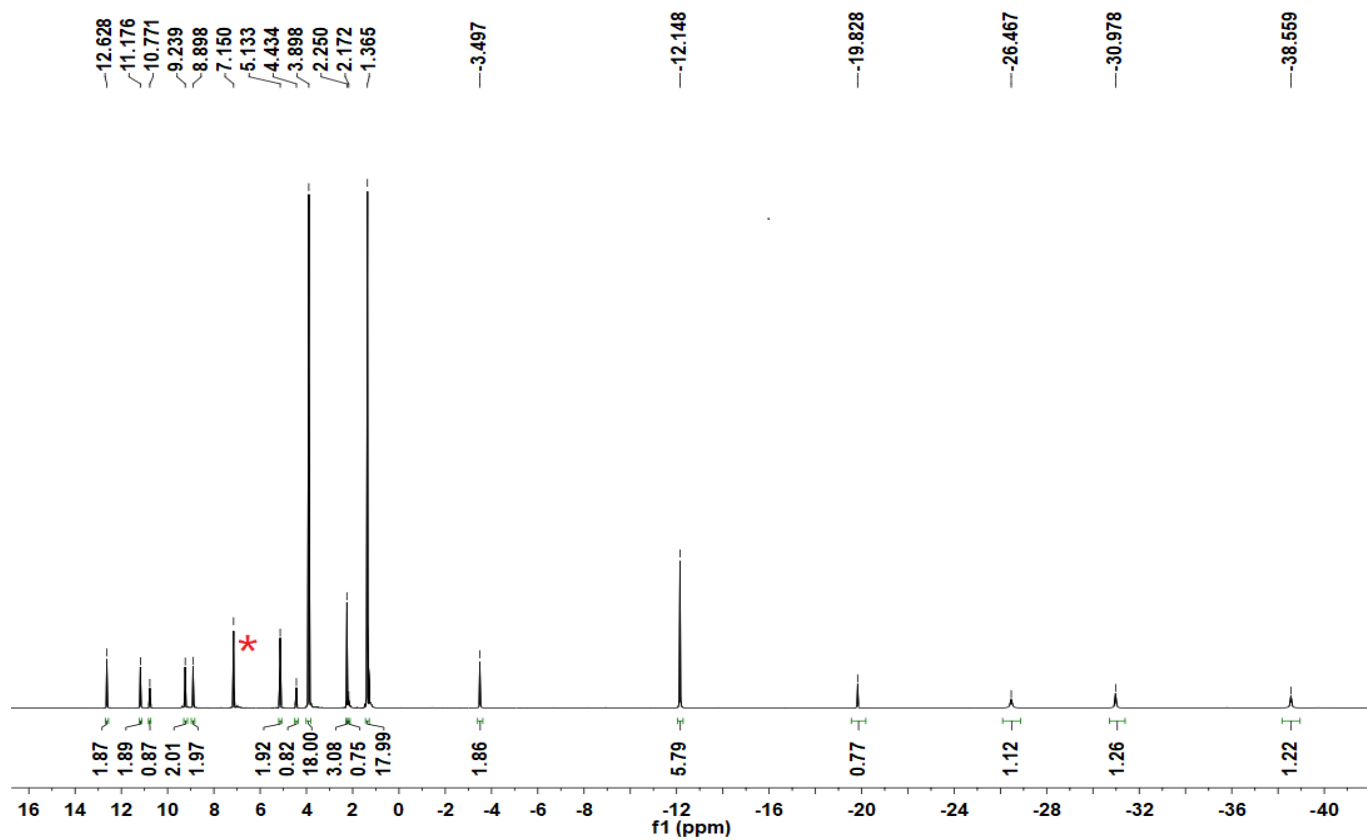

Figure S19.  $^1\text{H}$  NMR spectrum for compound **9** (\* solvent).

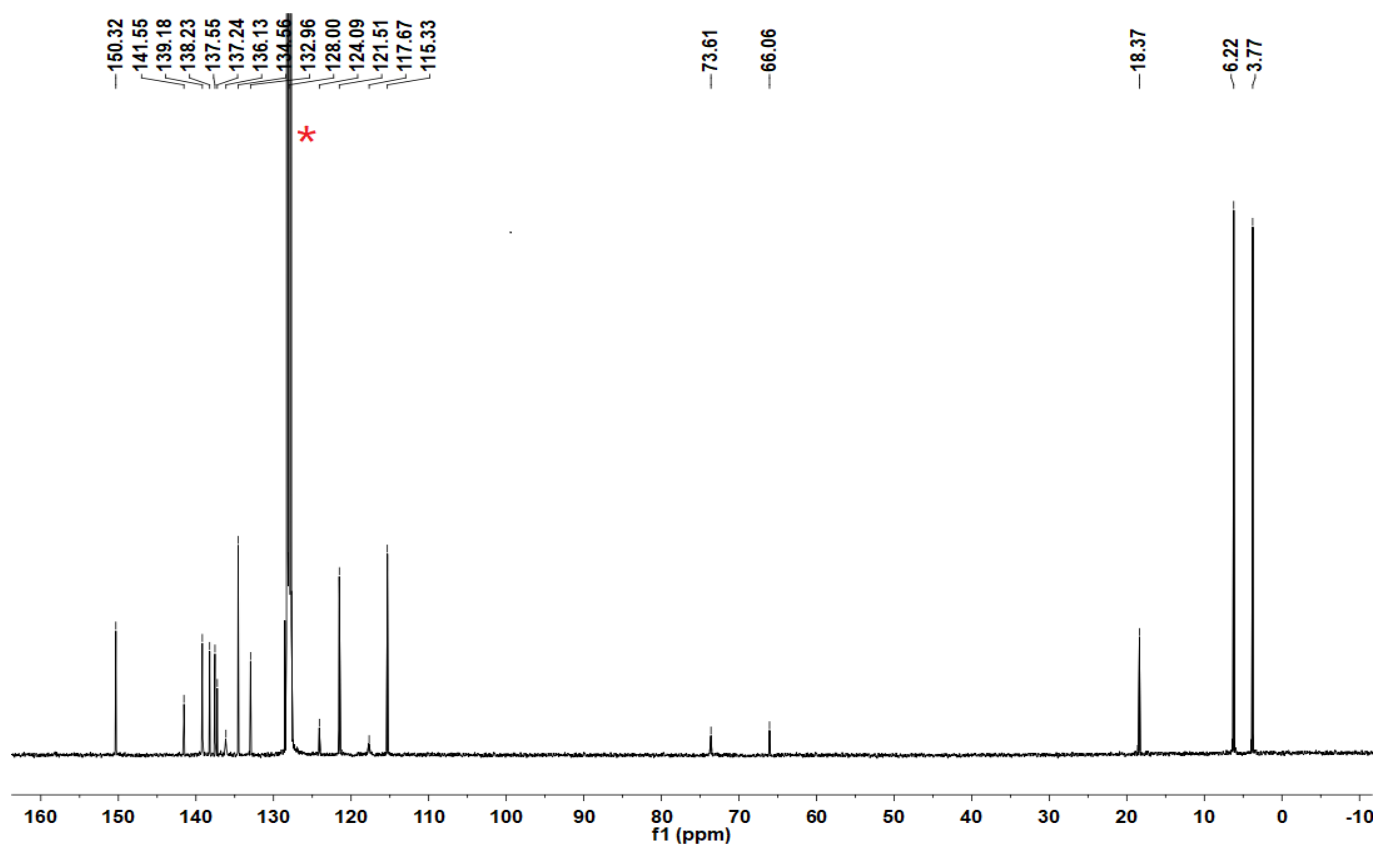

Figure S20.  $^{13}\text{C}\{^1\text{H}\}$  NMR spectrum for compound **9** (\* solvent).

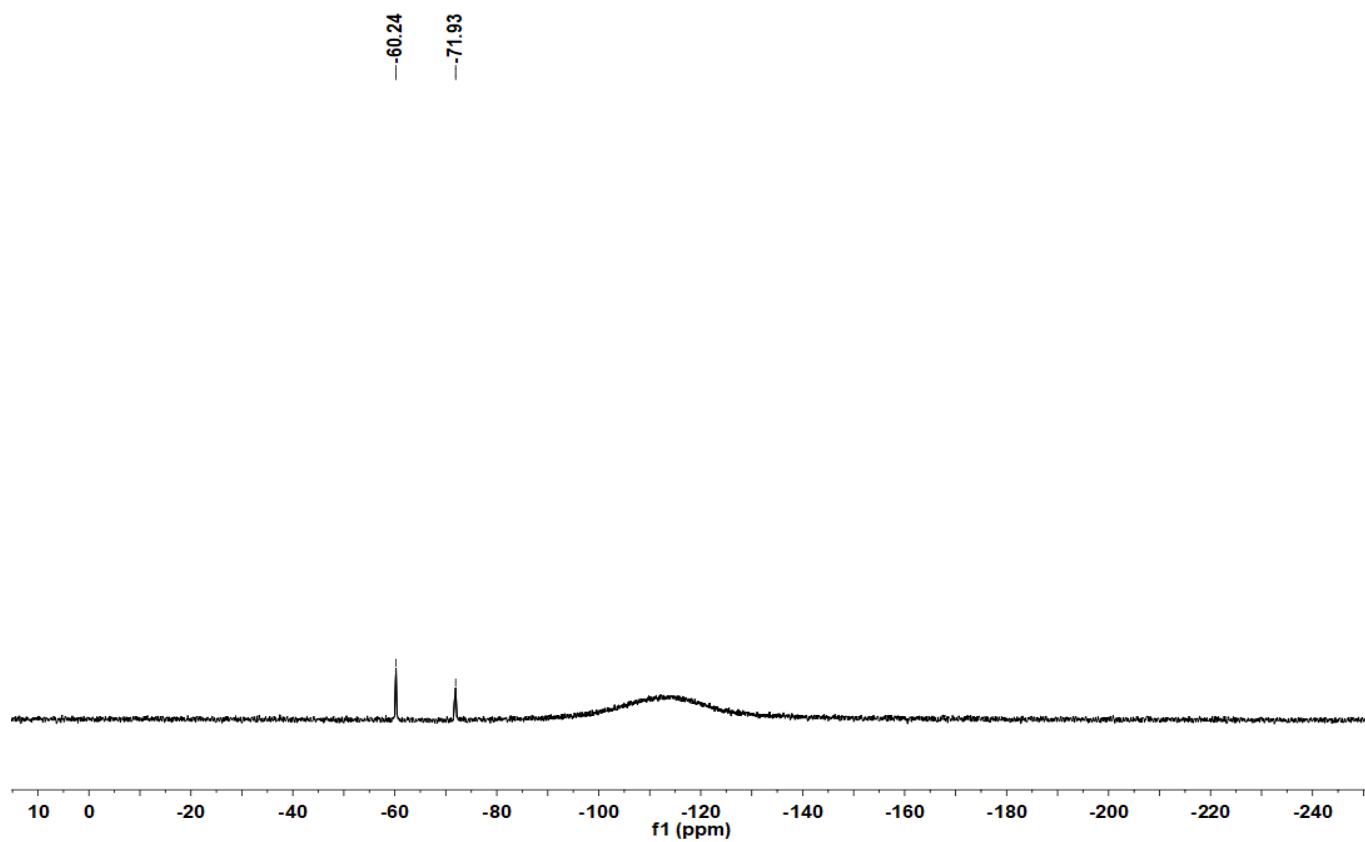

Figure S21.  $^{29}\text{Si}\{^1\text{H}\}$  NMR spectrum for compound **9** (\* solvent).

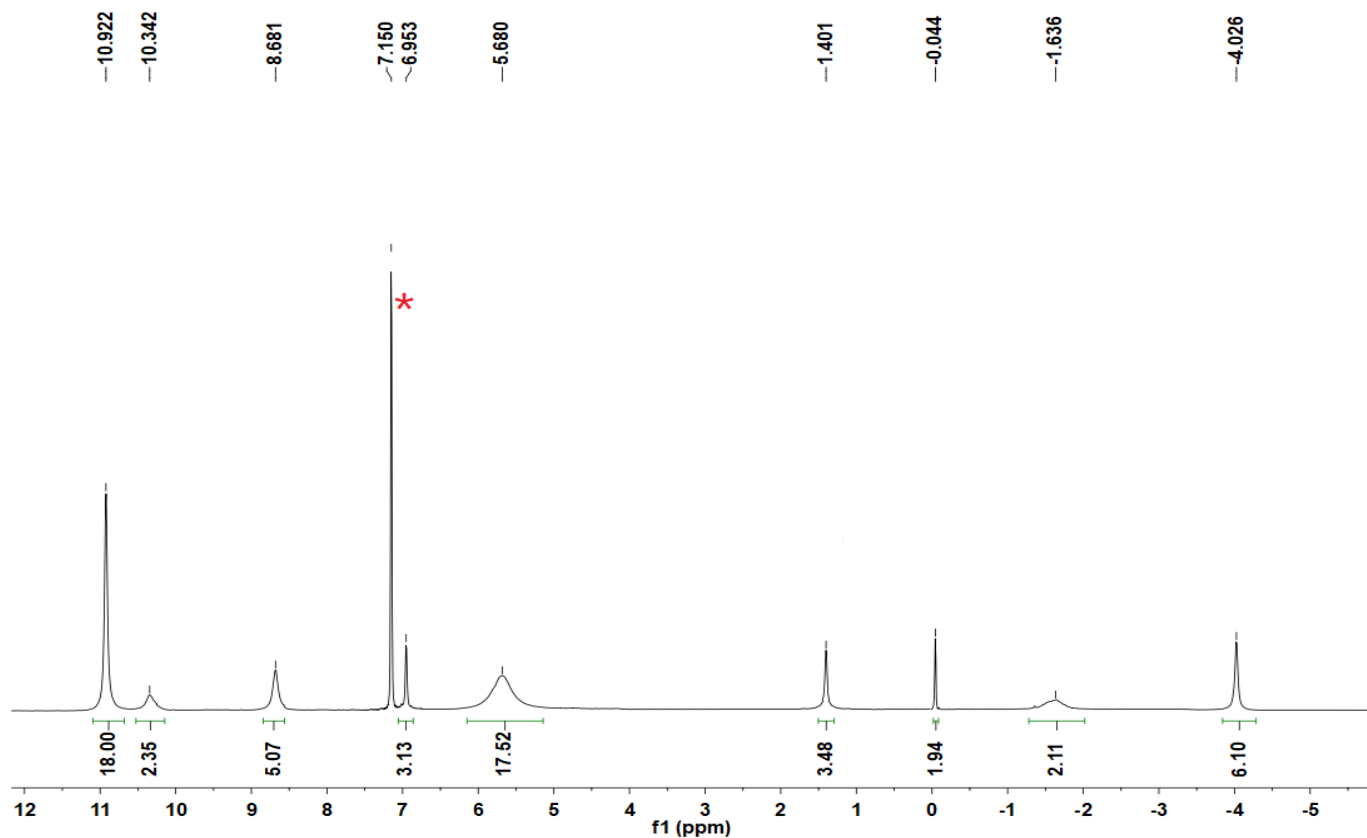

Figure S22.  $^1\text{H}$  NMR spectrum for compound **10** (\* solvent).

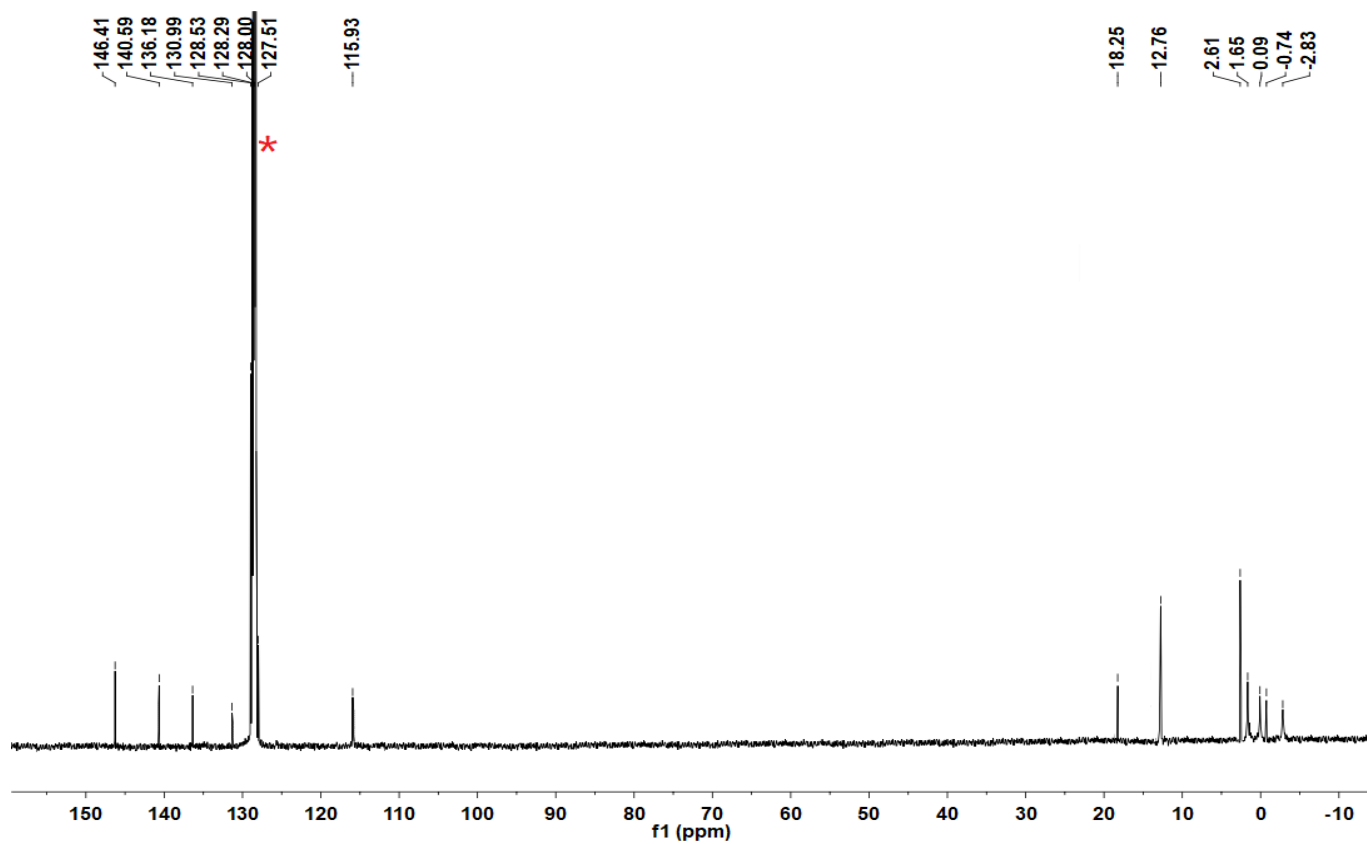

Figure S23.  $^{13}\text{C}\{^1\text{H}\}$  NMR spectrum for compound **10** (\* solvent).

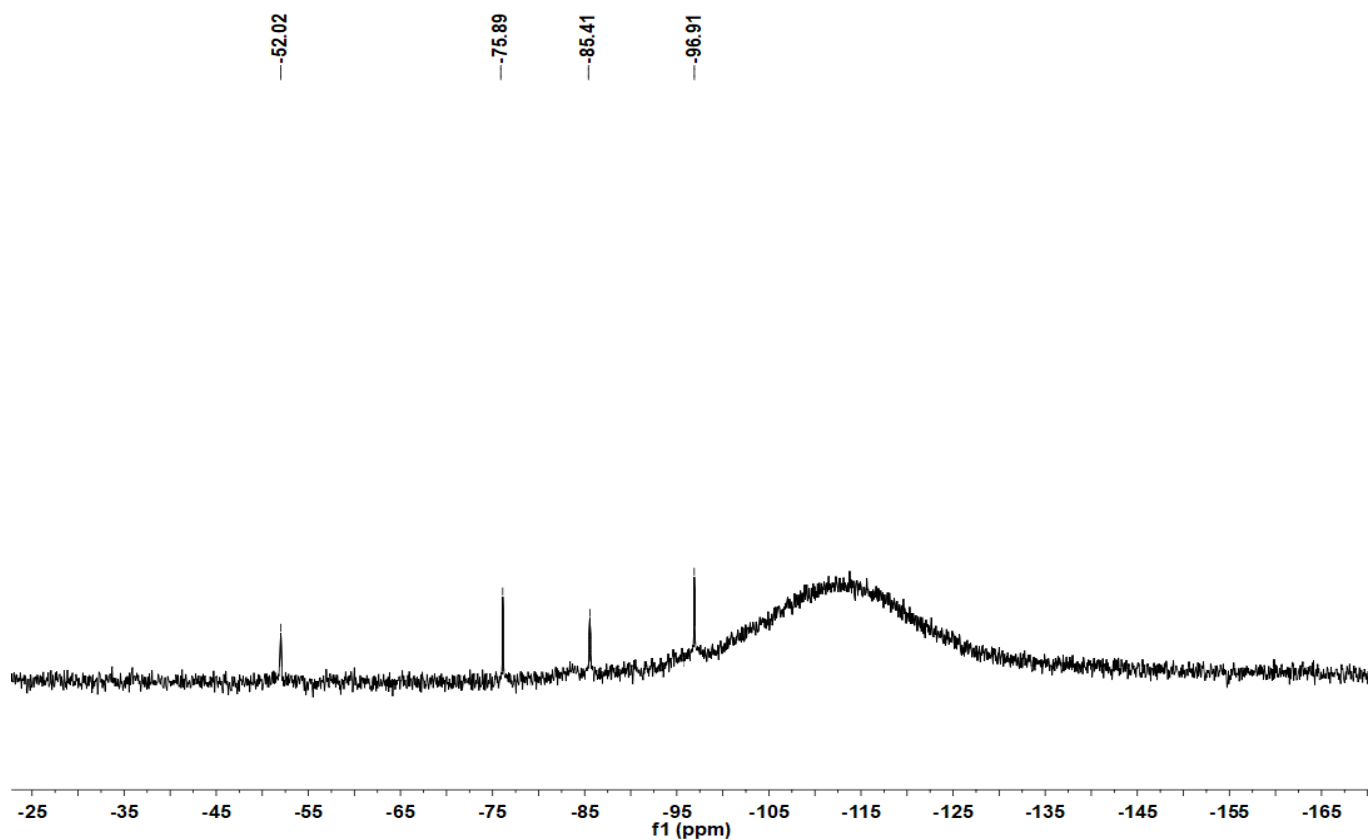

Figure S24.  $^{29}\text{Si}\{^1\text{H}\}$  NMR spectrum for compound **10** (\* solvent).

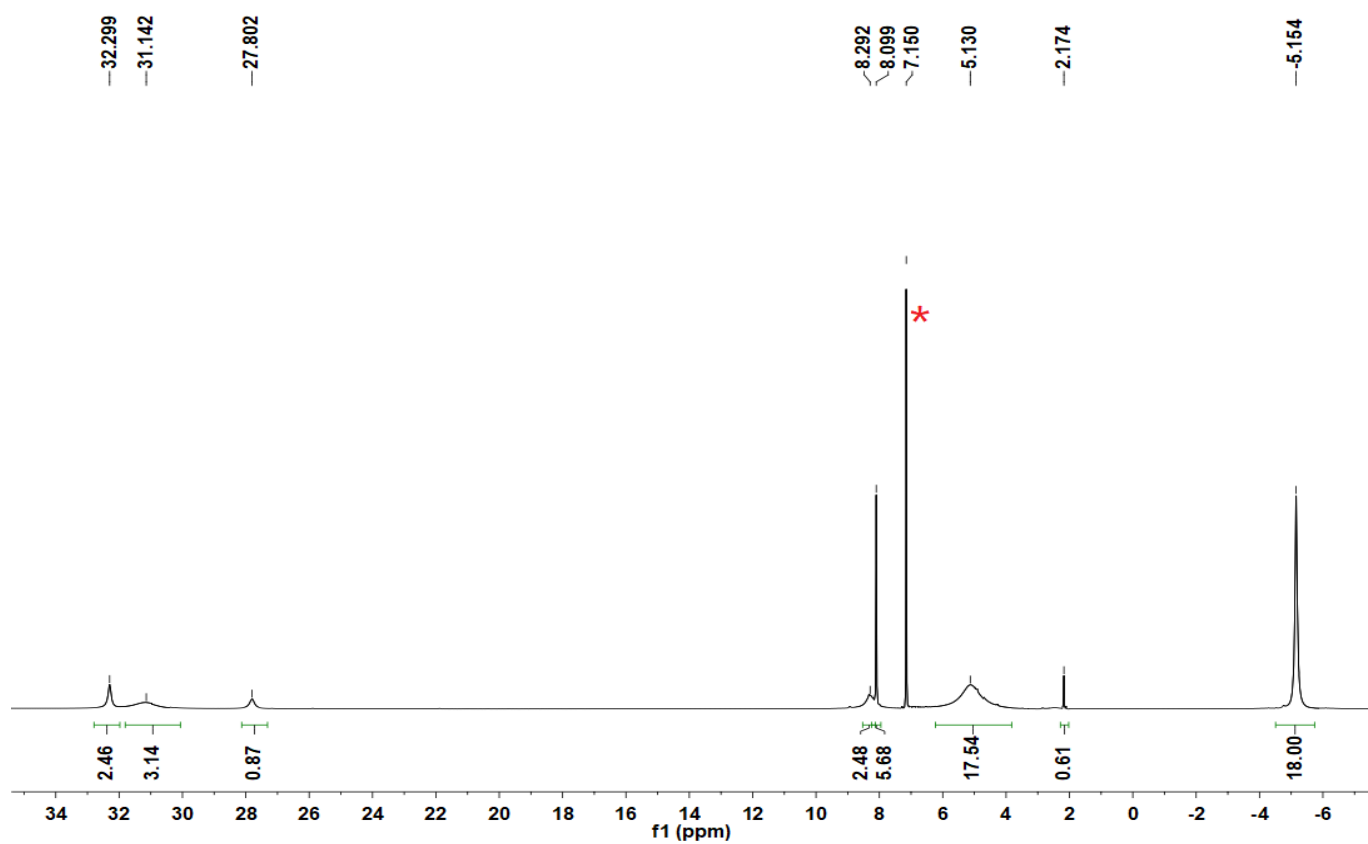

Figure S25.  $^1\text{H}$  NMR spectrum for compound **12** (\* solvent).



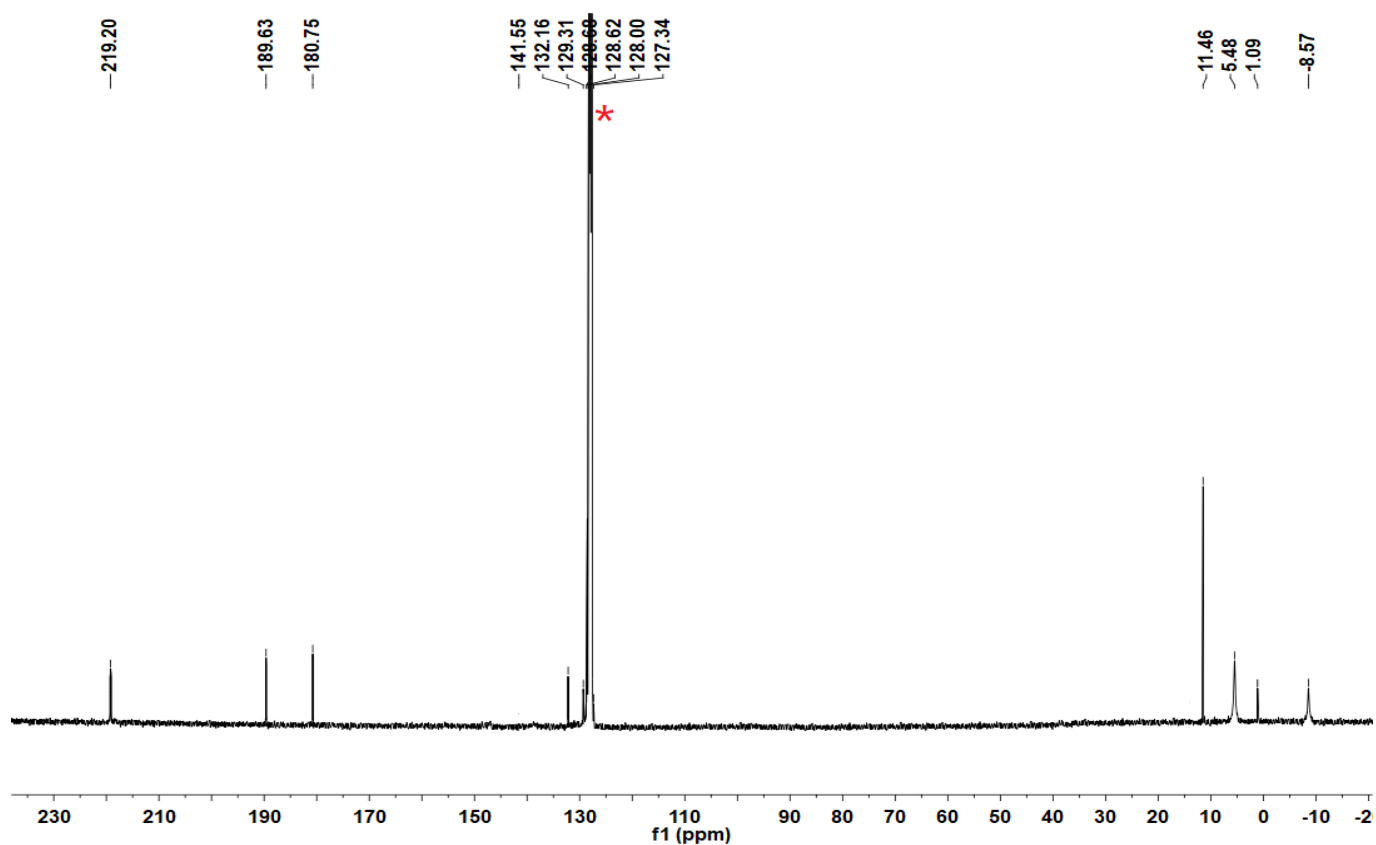

Figure S26.  $^{13}\text{C}\{^1\text{H}\}$  NMR spectrum for compound **12** (\* solvent).

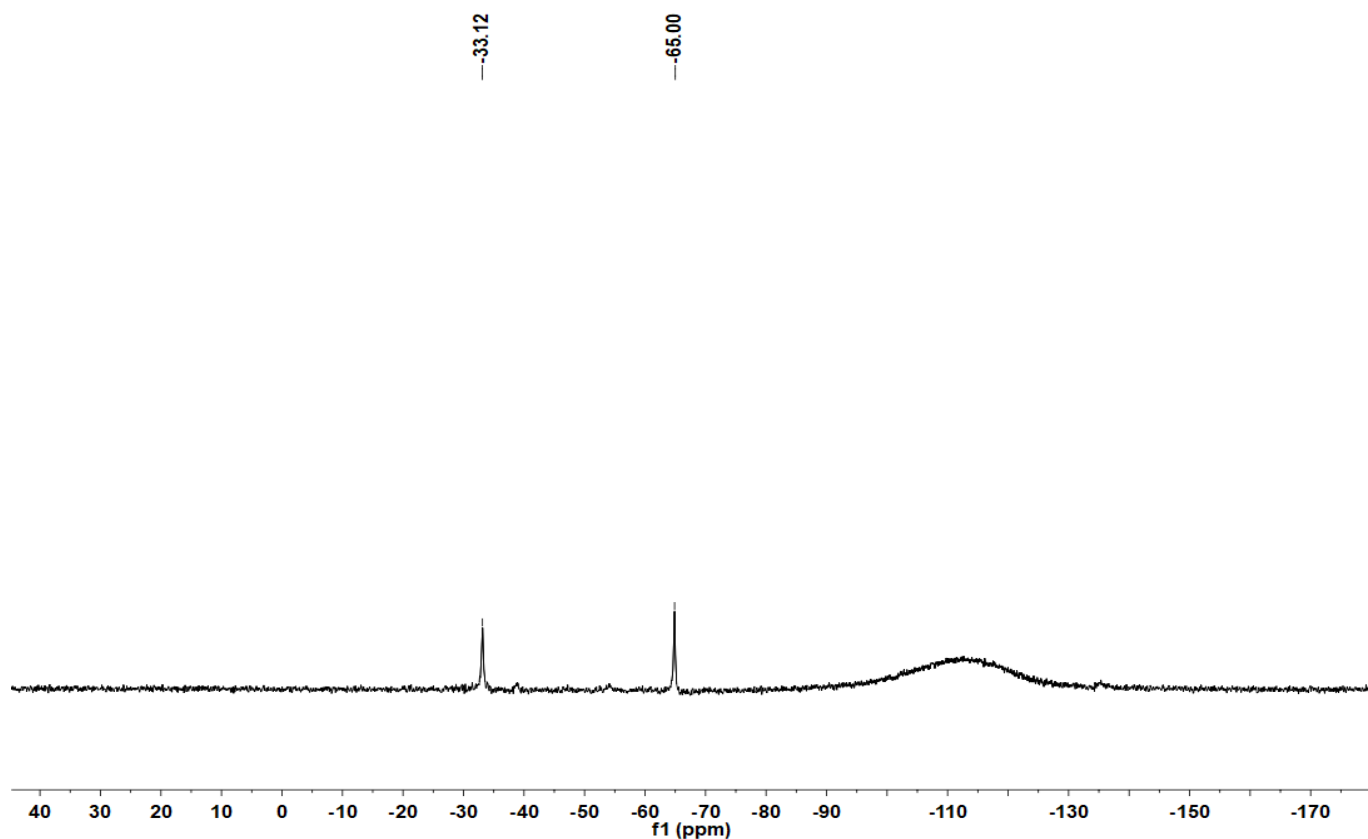

Figure S27.  $^{29}\text{Si}\{^1\text{H}\}$  NMR spectrum for compound **12** (\* solvent).

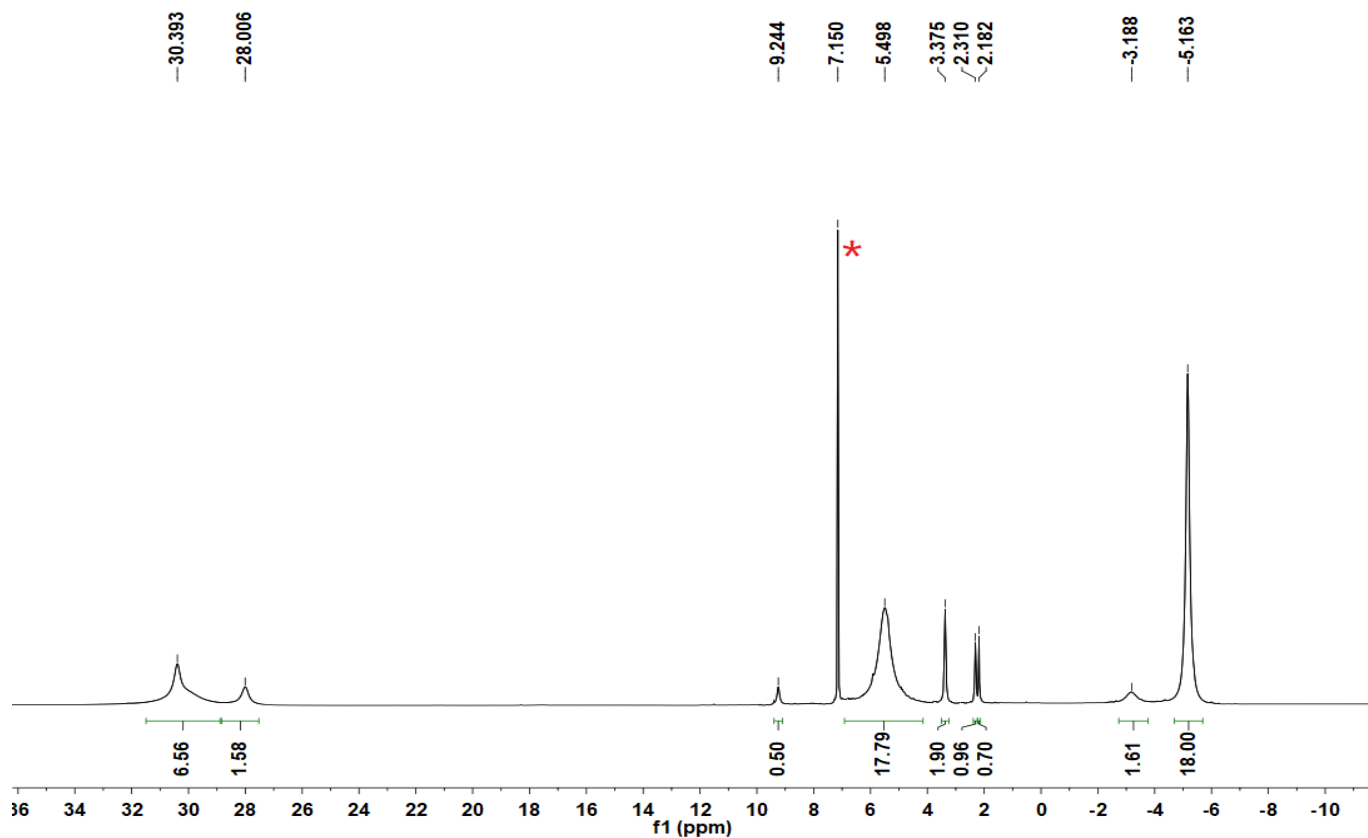

Figure S28.  $^1\text{H}$  NMR spectrum for compound **13** (\* solvent).

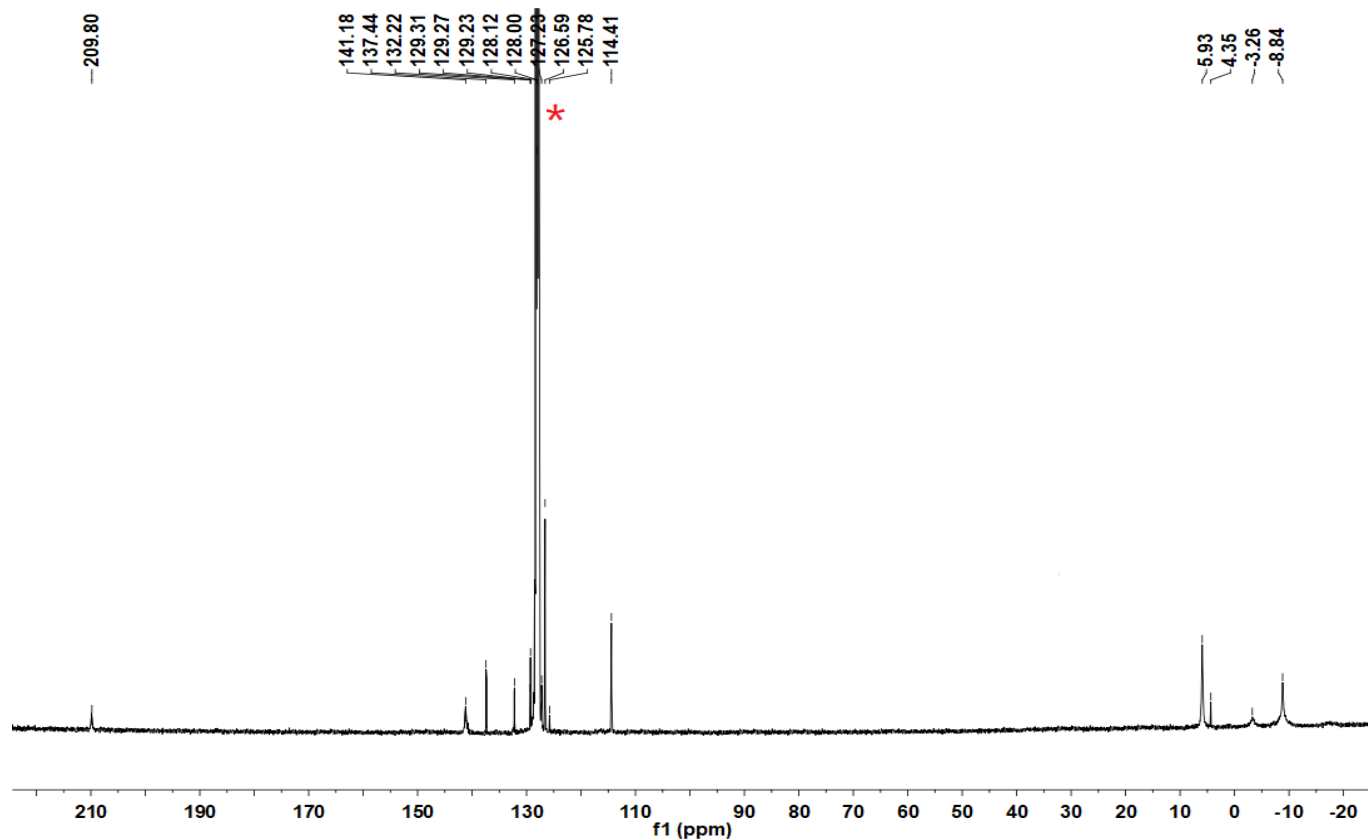

Figure S29.  $^{13}\text{C}\{^1\text{H}\}$  NMR spectrum for compound **13** (\* solvent).

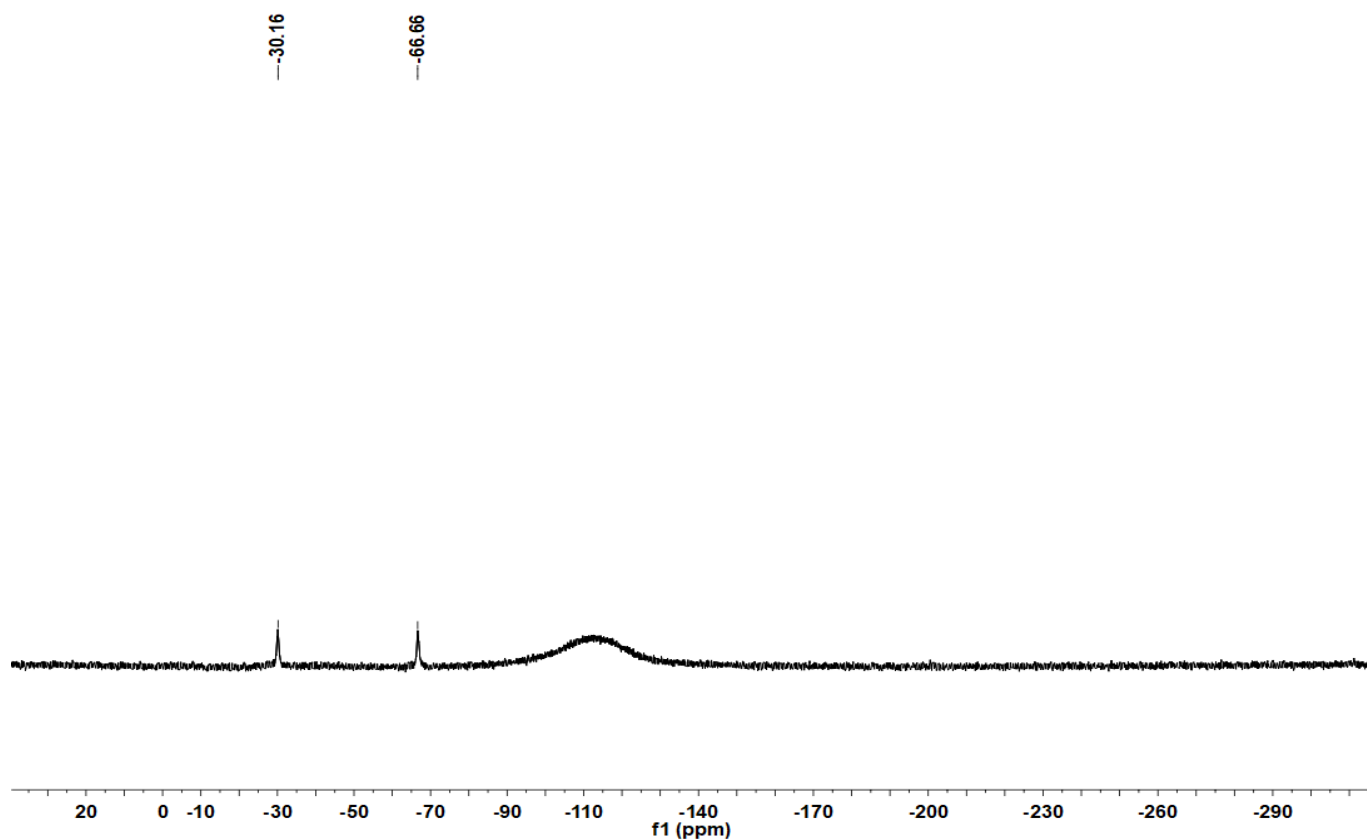

Figure S30.  $^{29}\text{Si}\{^1\text{H}\}$  NMR spectrum for compound **13** (\* solvent).

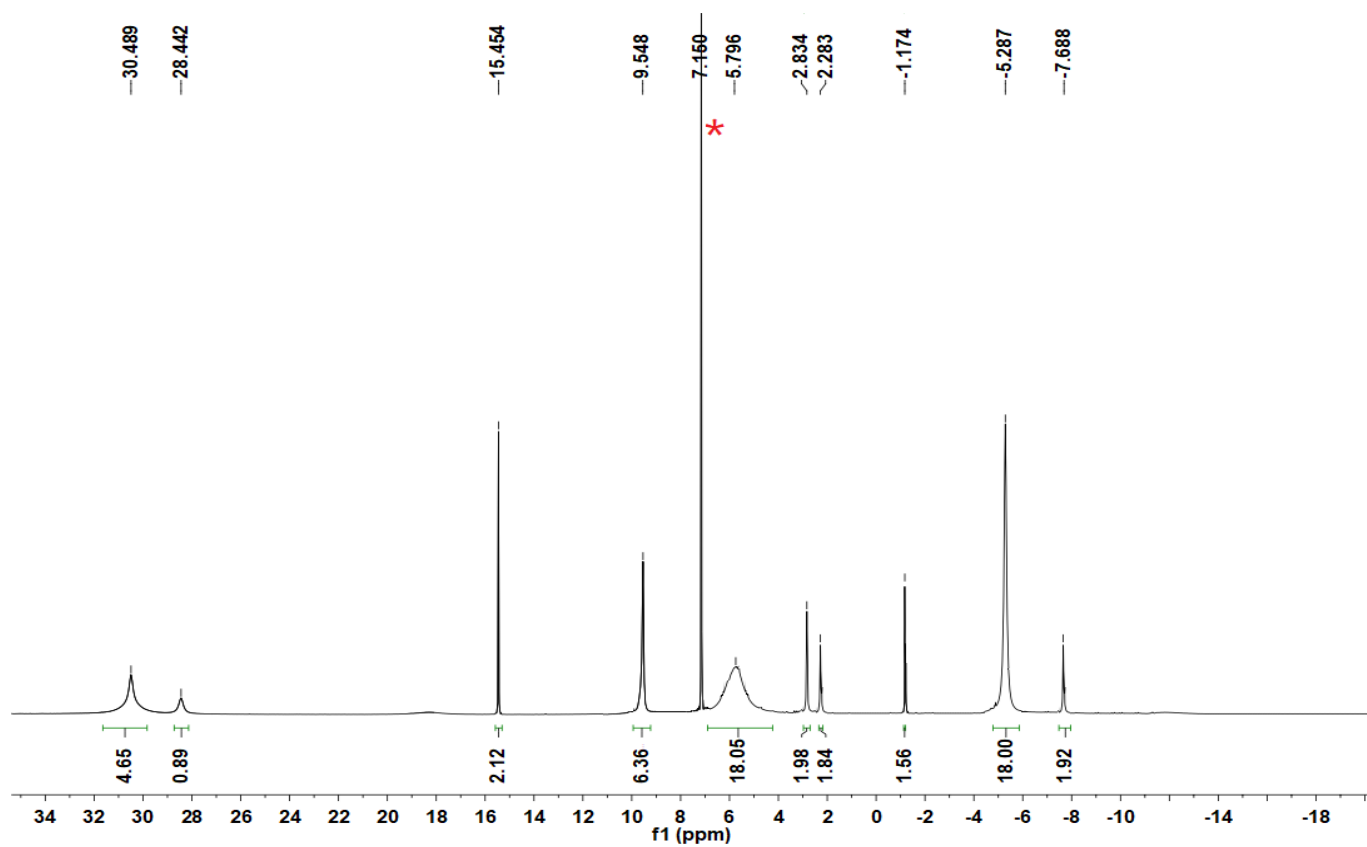

Figure S31.  $^1\text{H}$  NMR spectrum for compound **14** (\* solvent).

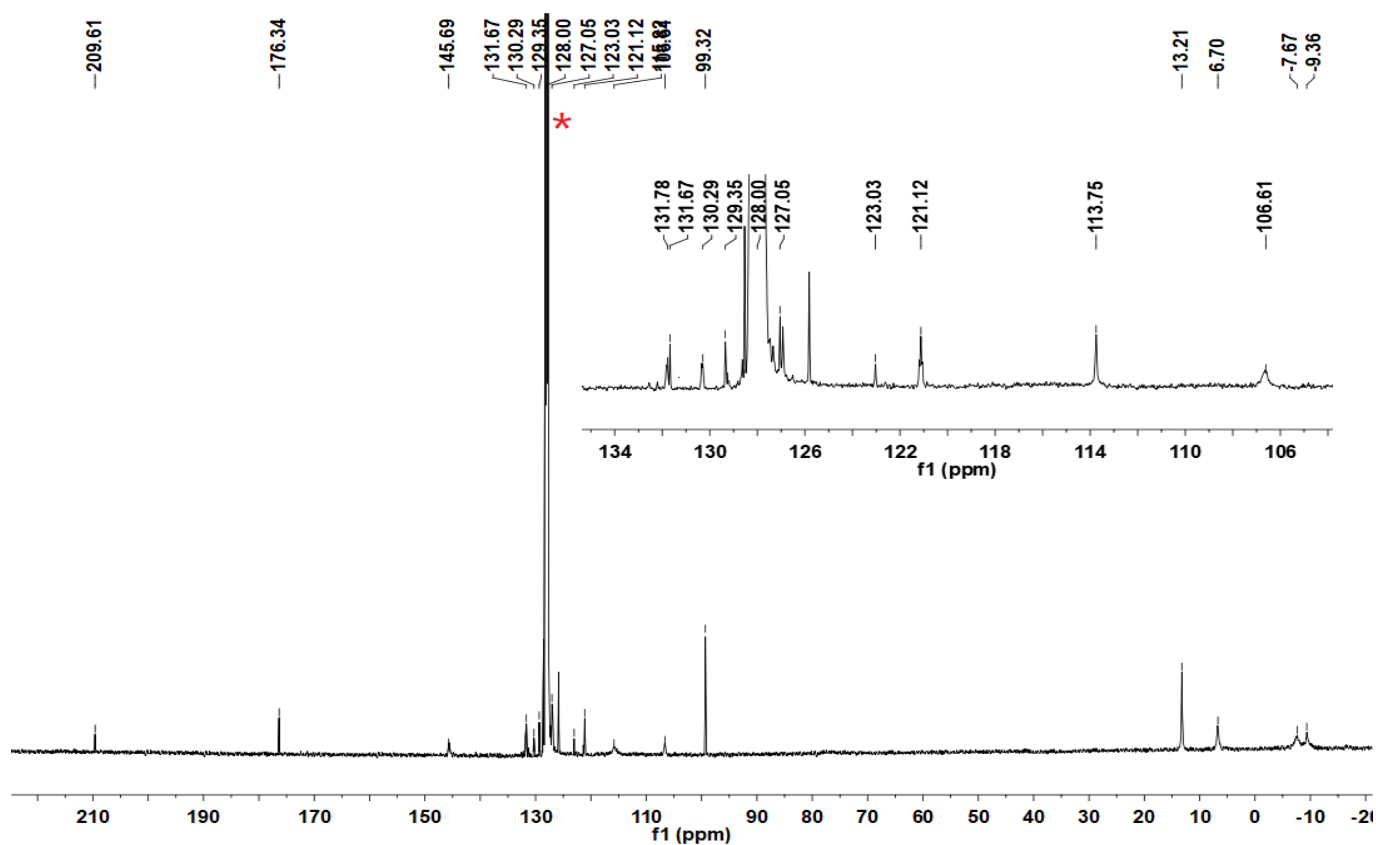

Figure S32.  $^{13}\text{C}\{^1\text{H}\}$  NMR spectrum for compound **14** (\* solvent).

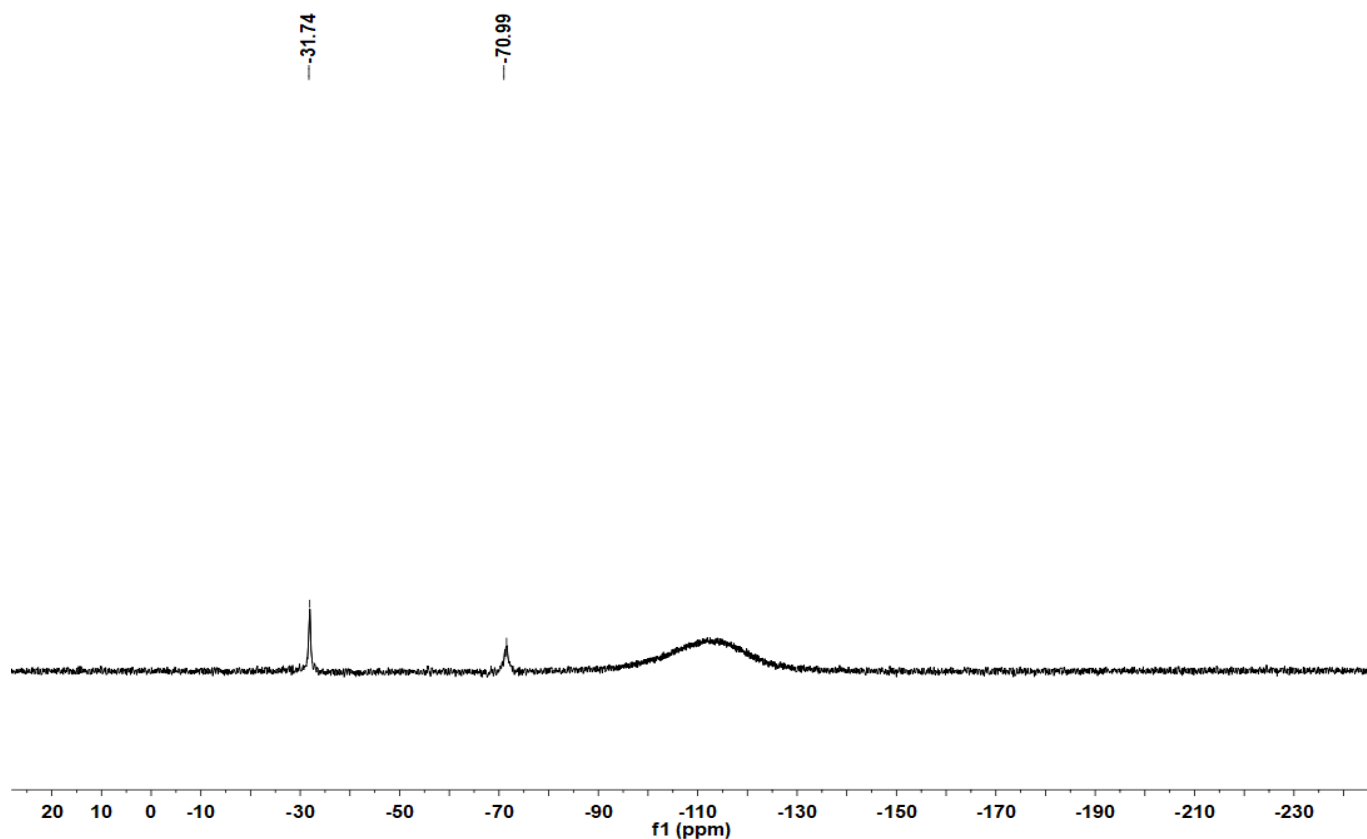

Figure S33.  $^{29}\text{Si}\{^1\text{H}\}$  NMR spectrum for compound **14** (\* solvent).

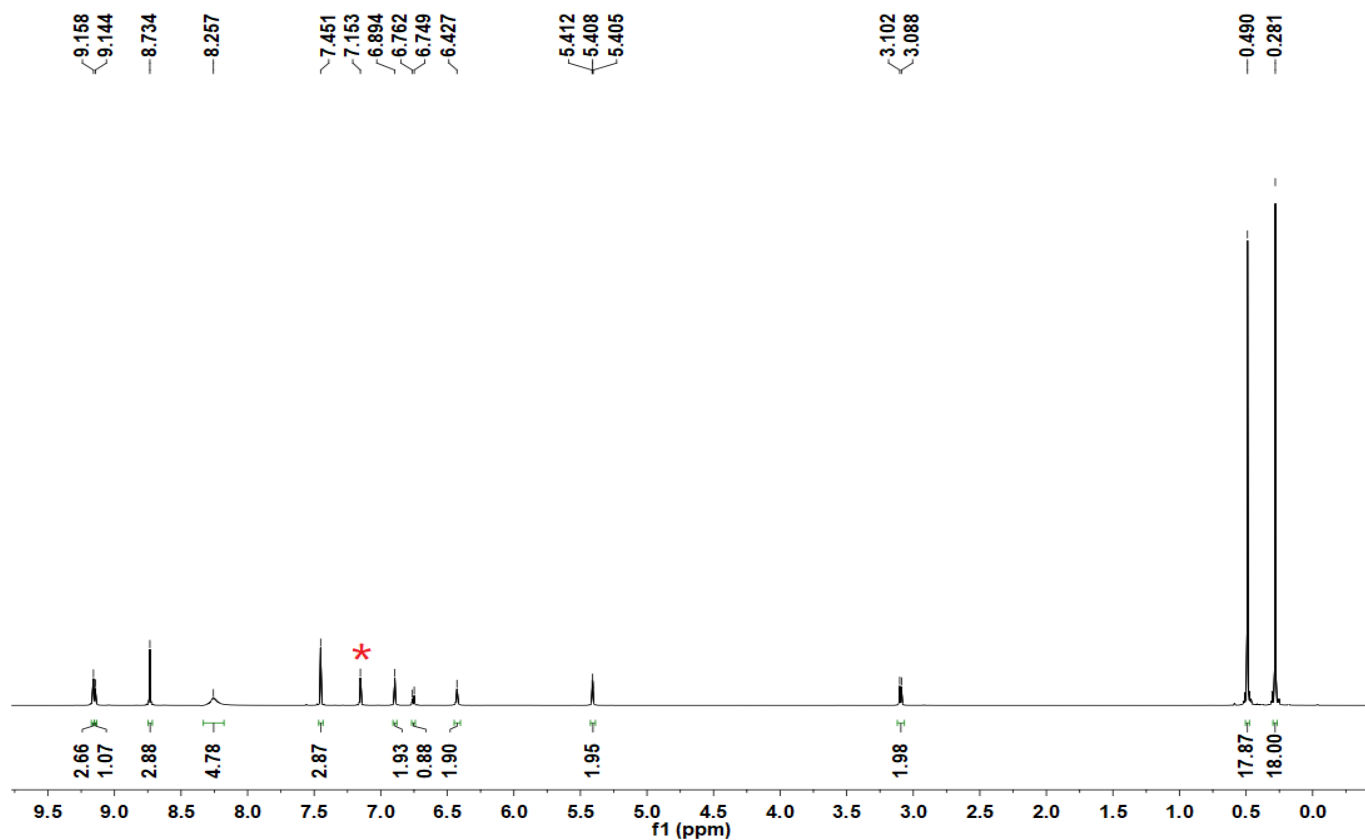

Figure S34.  $^1\text{H}$  NMR spectrum for compound **15** (\* solvent).

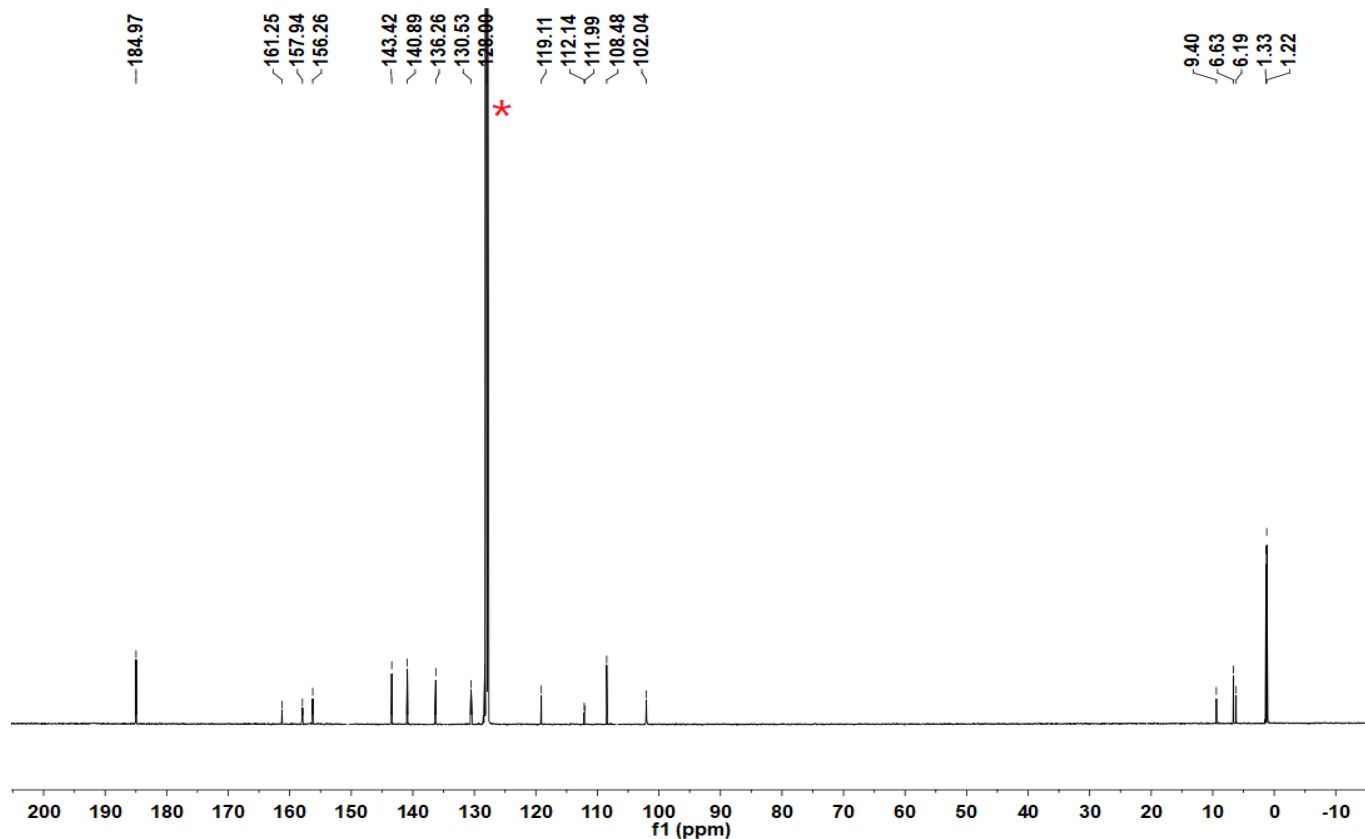

Figure S35.  $^{13}\text{C}\{^1\text{H}\}$  NMR spectrum for compound **15** (\* solvent).

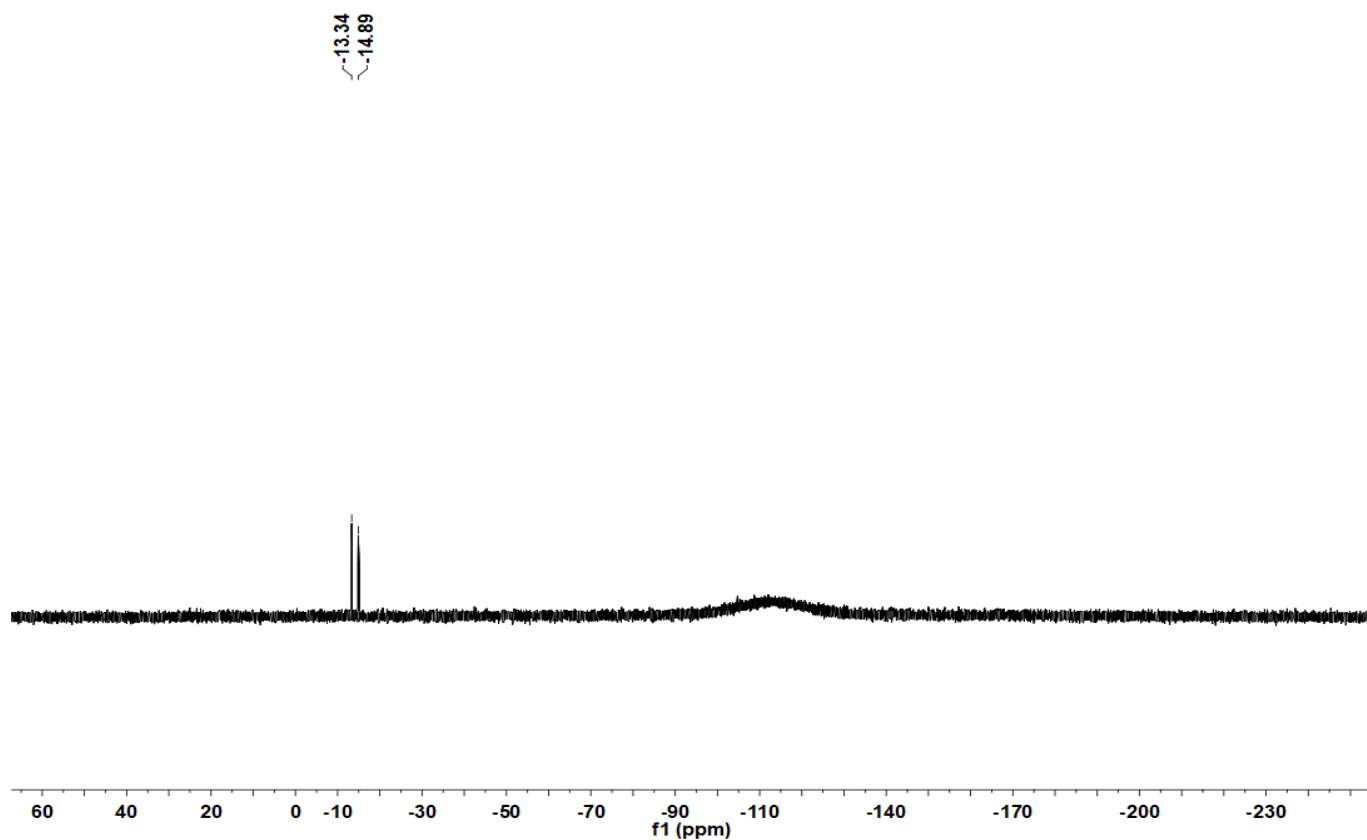

Figure S36.  $^{29}\text{Si}\{^1\text{H}\}$  NMR spectrum for compound **15** (\* solvent).

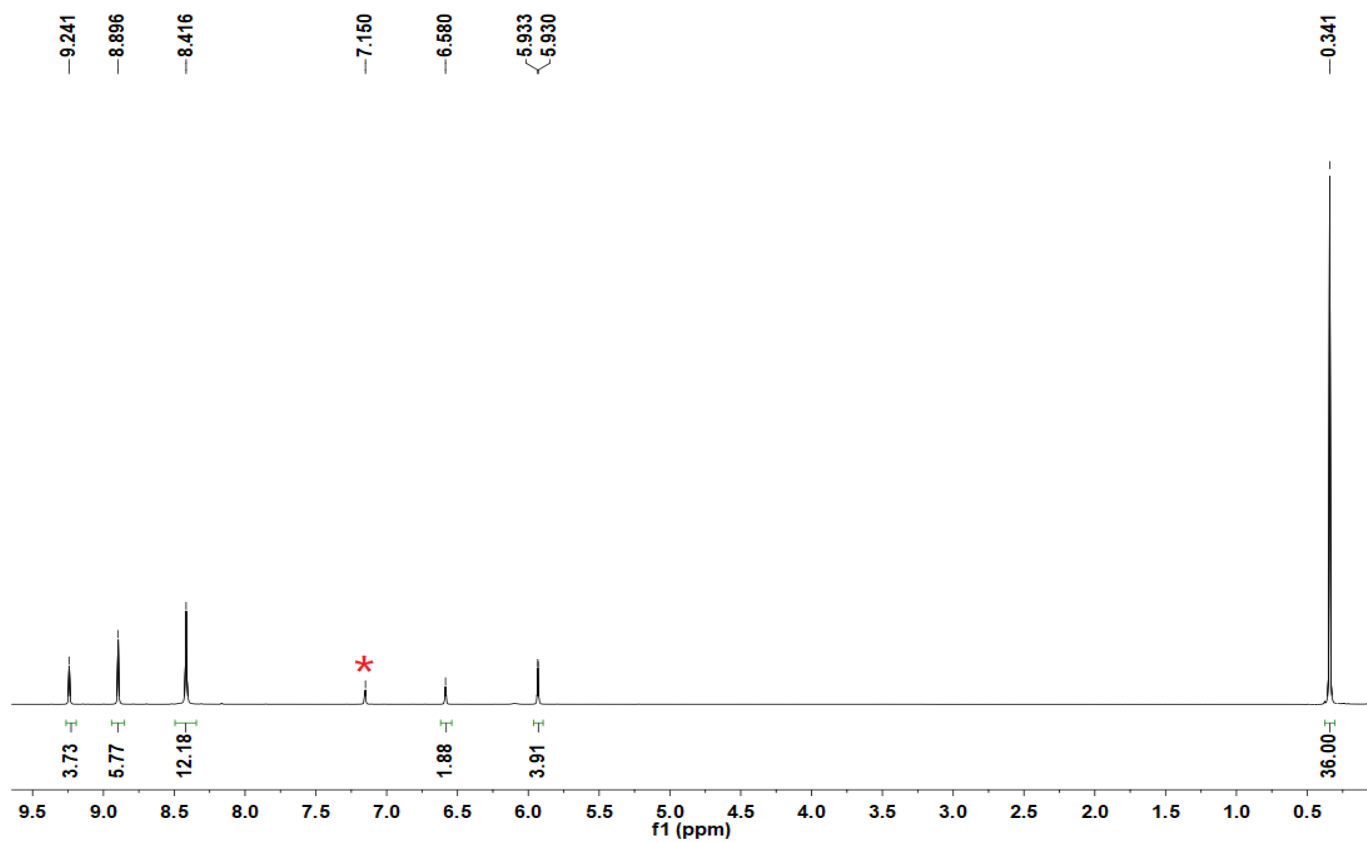

Figure S37.  $^1\text{H}$  NMR spectrum for compound **16** (\* solvent).

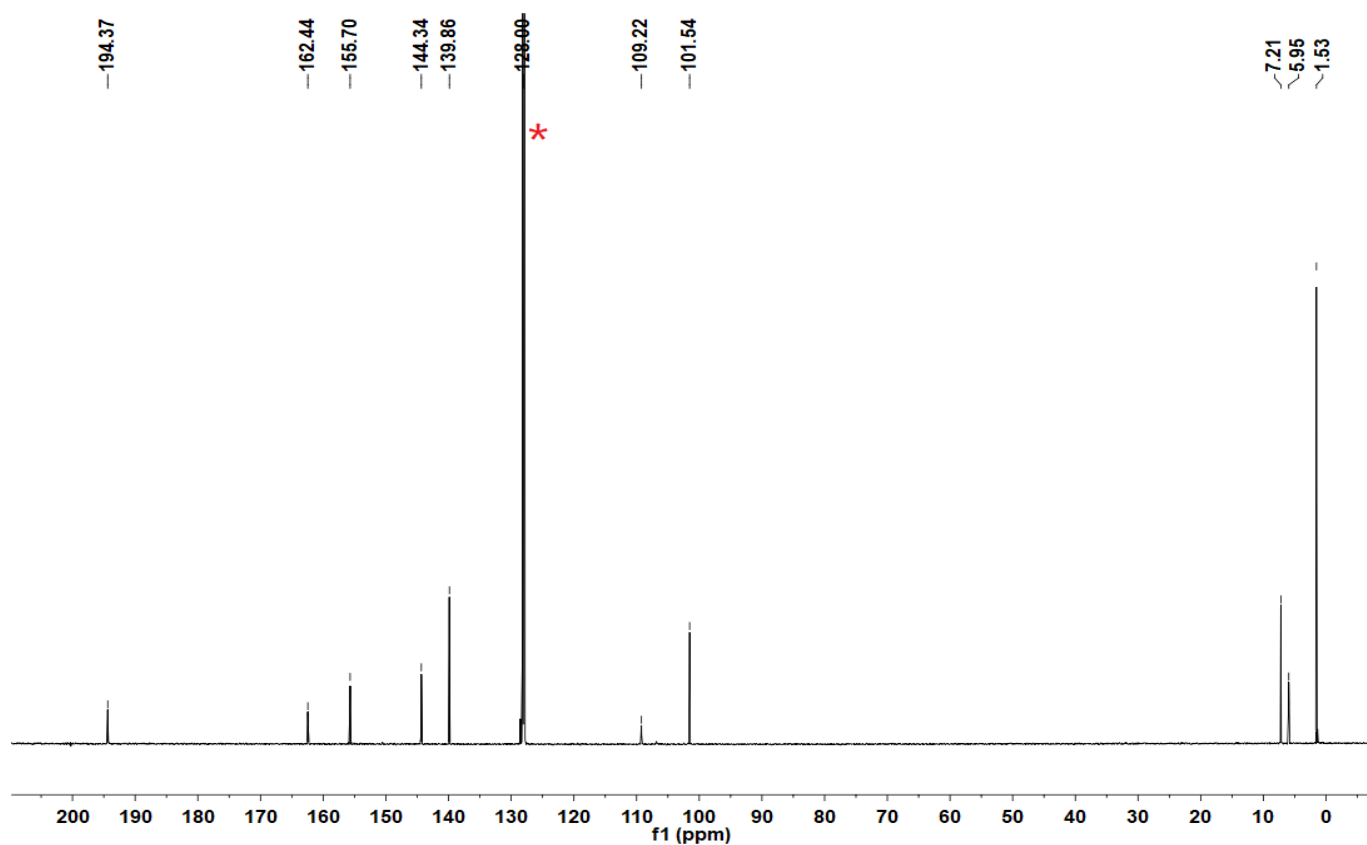

Figure S38.  $^{13}\text{C}\{^1\text{H}\}$  NMR spectrum for compound **16** (\* solvent).

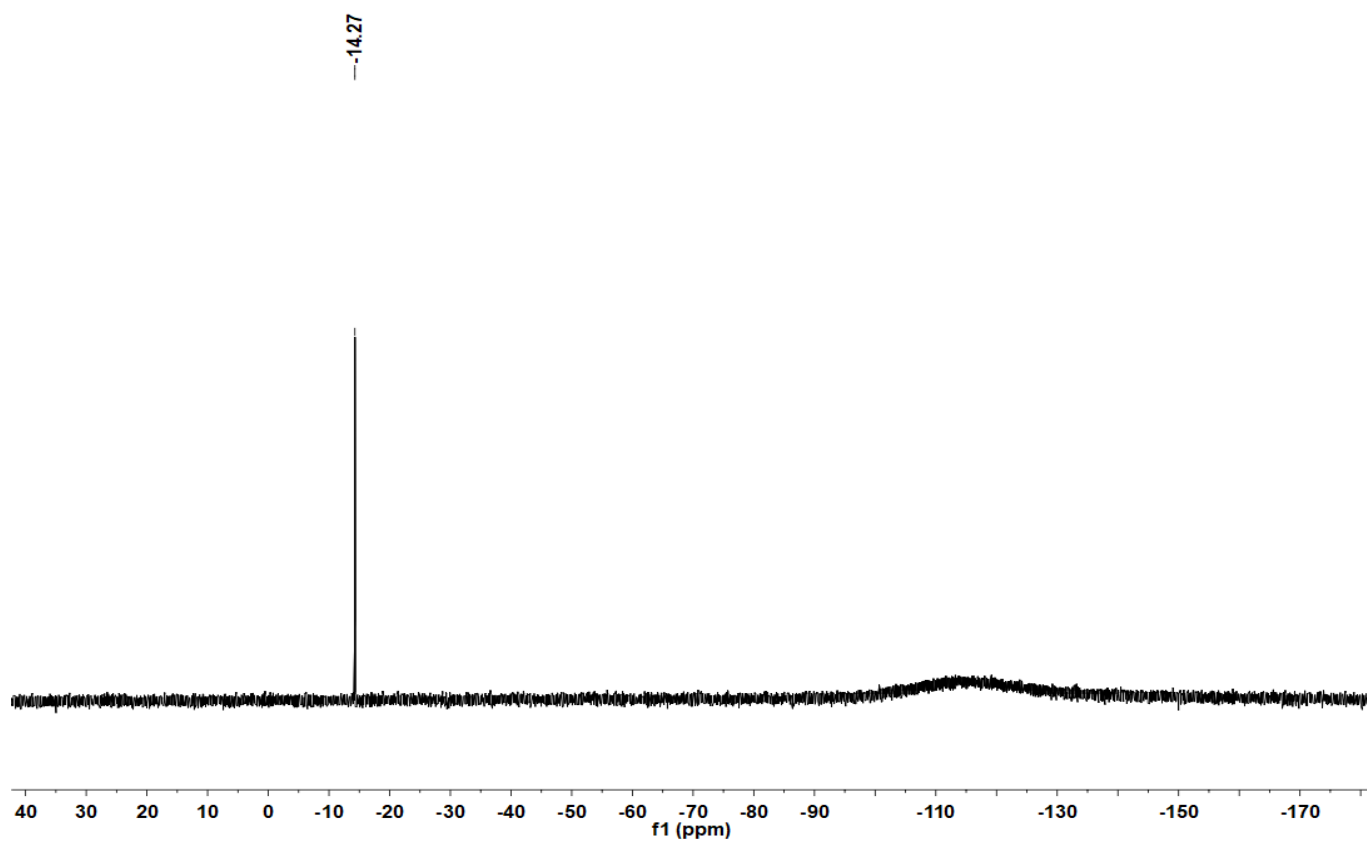

Figure S39.  $^{29}\text{Si}\{^1\text{H}\}$  NMR spectrum for compound **16** (\* solvent).

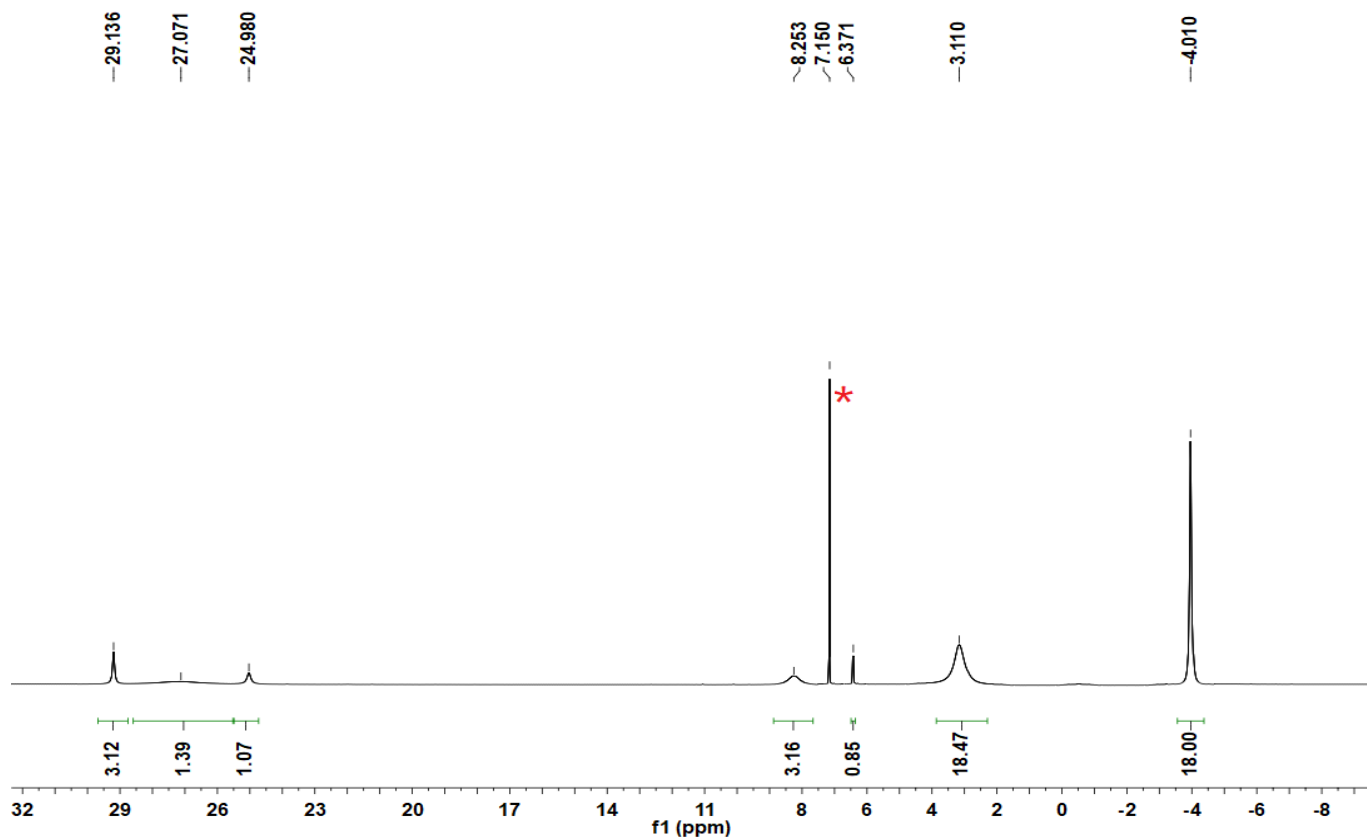

Figure S40.  $^1\text{H}$  NMR spectrum for compound **17** (\* solvent).

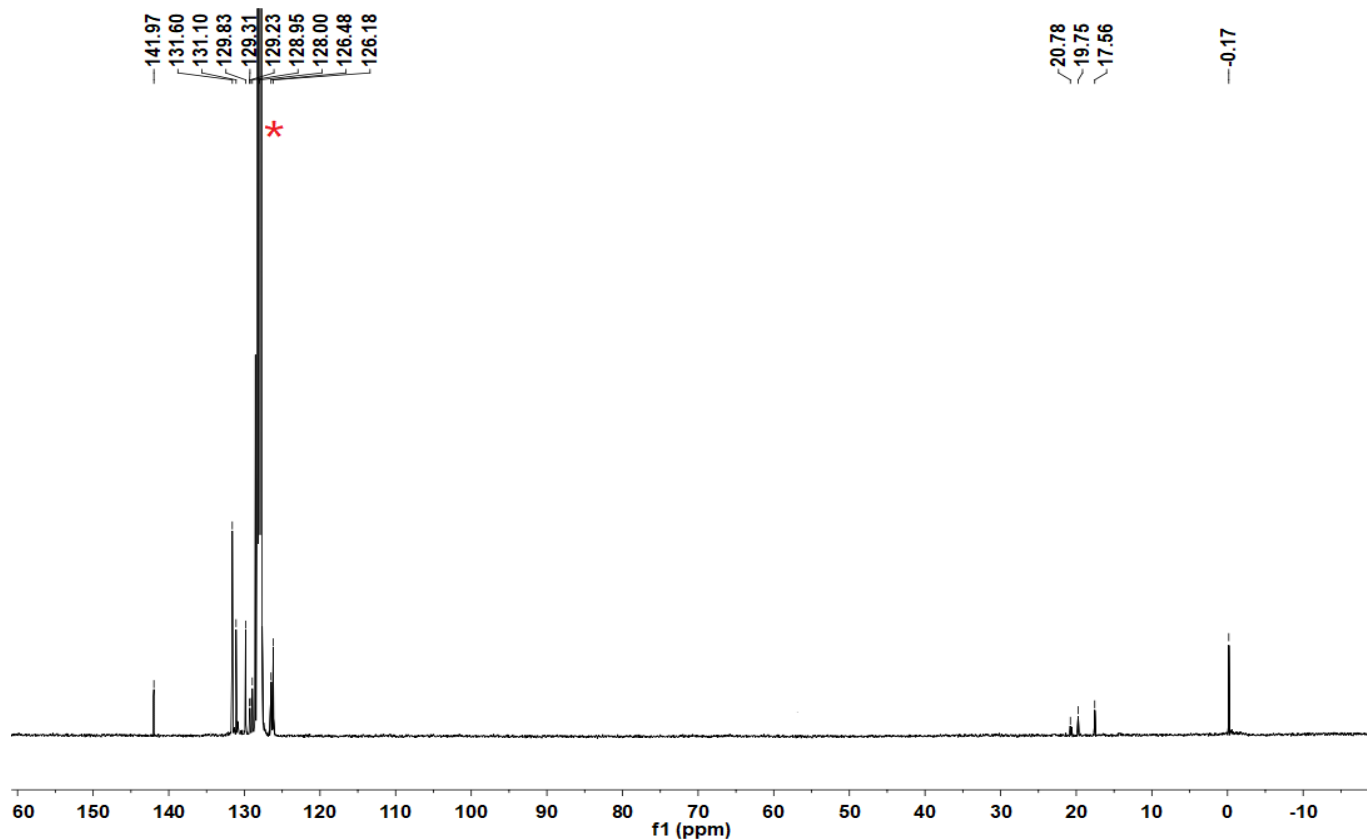

Figure S41.  $^{13}\text{C}\{^1\text{H}\}$  NMR spectrum for compound **17** (\* solvent).



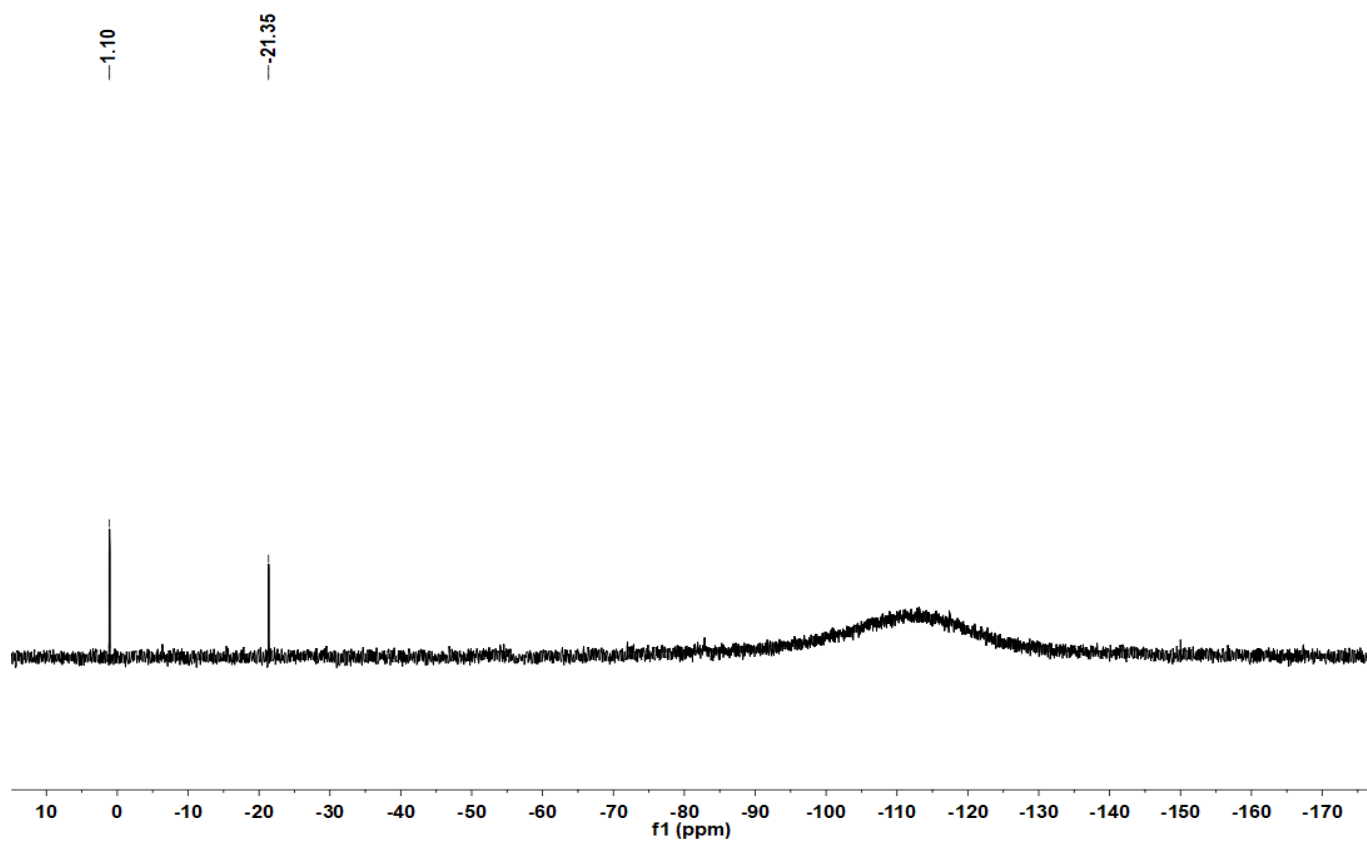

**Figure S42.**  $^{29}\text{Si}\{^1\text{H}\}$  NMR spectrum for compound **17** (\* solvent).

#### 4. UV-vis-NIR spectra

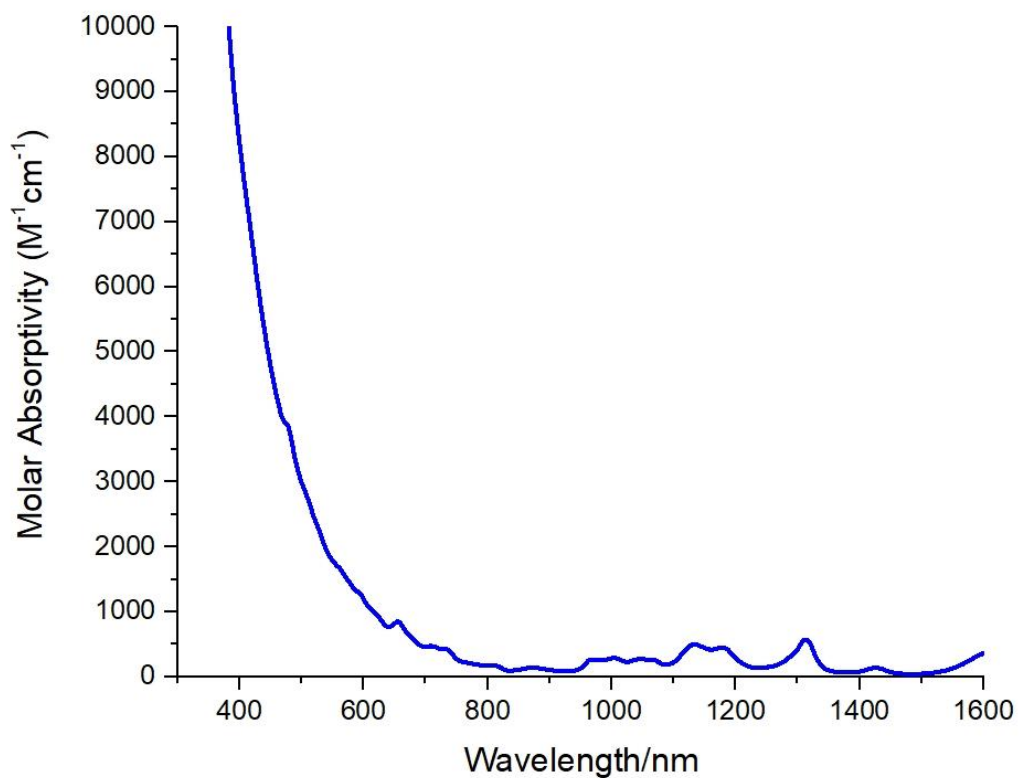

Fig. S43. UV-Vis spectrum of 2.

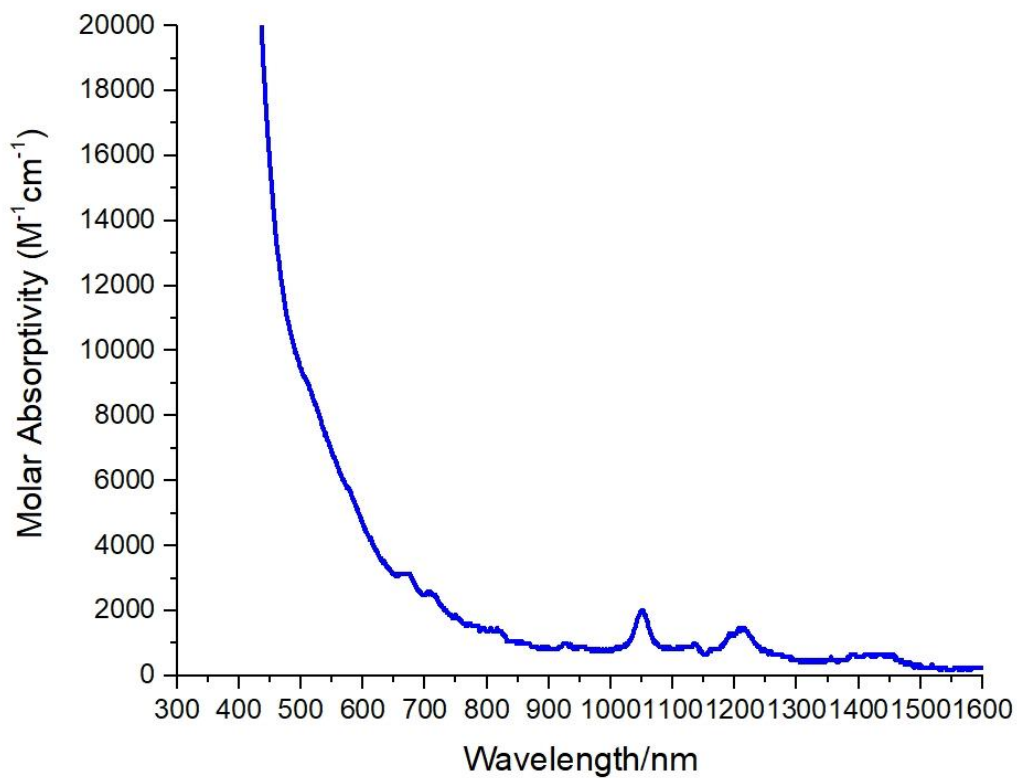

Fig. S44. UV-Vis spectrum of 3.

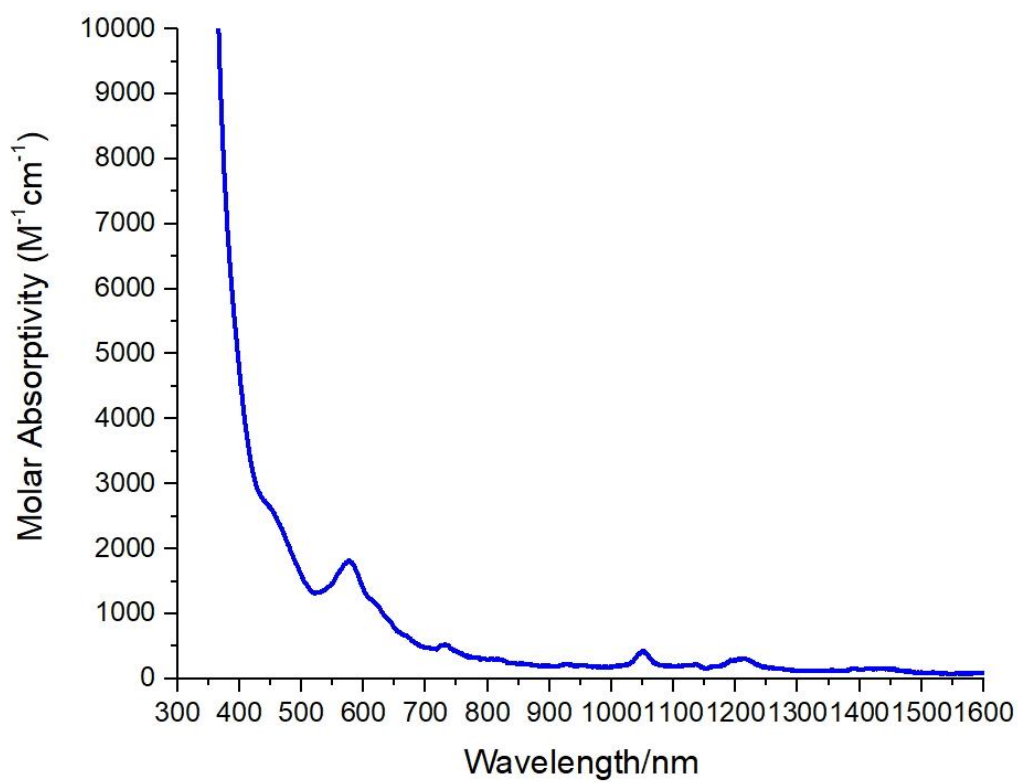

Fig. S45. UV-Vis spectrum of 4.

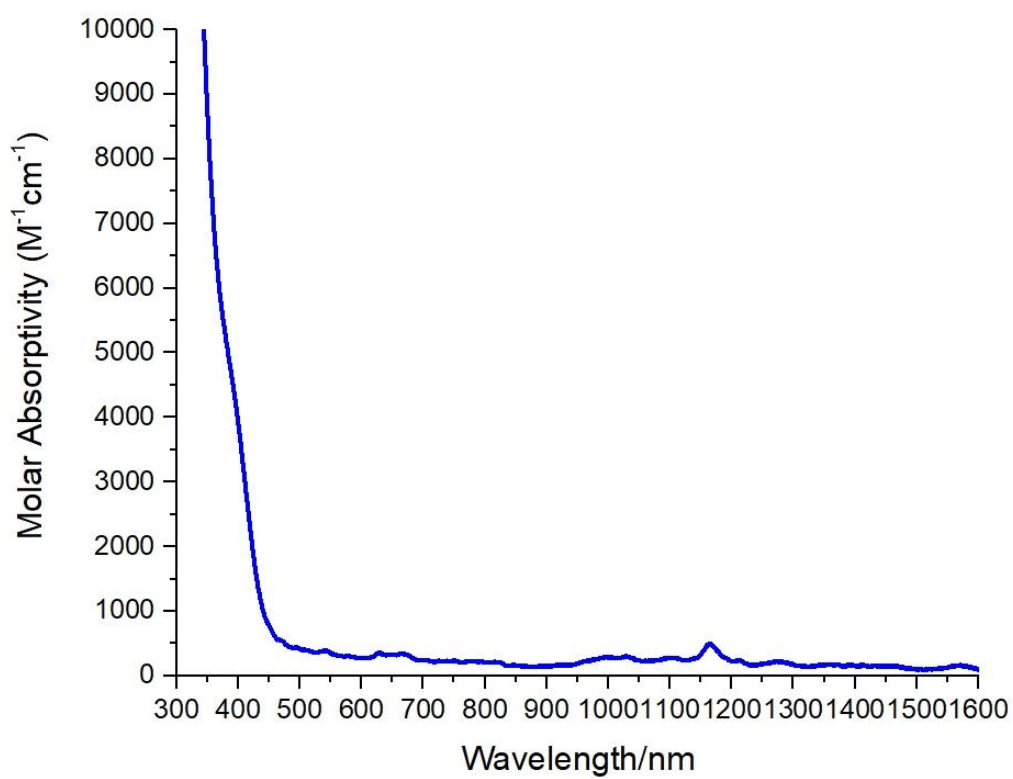

Fig. S46. UV-Vis spectrum of 7.

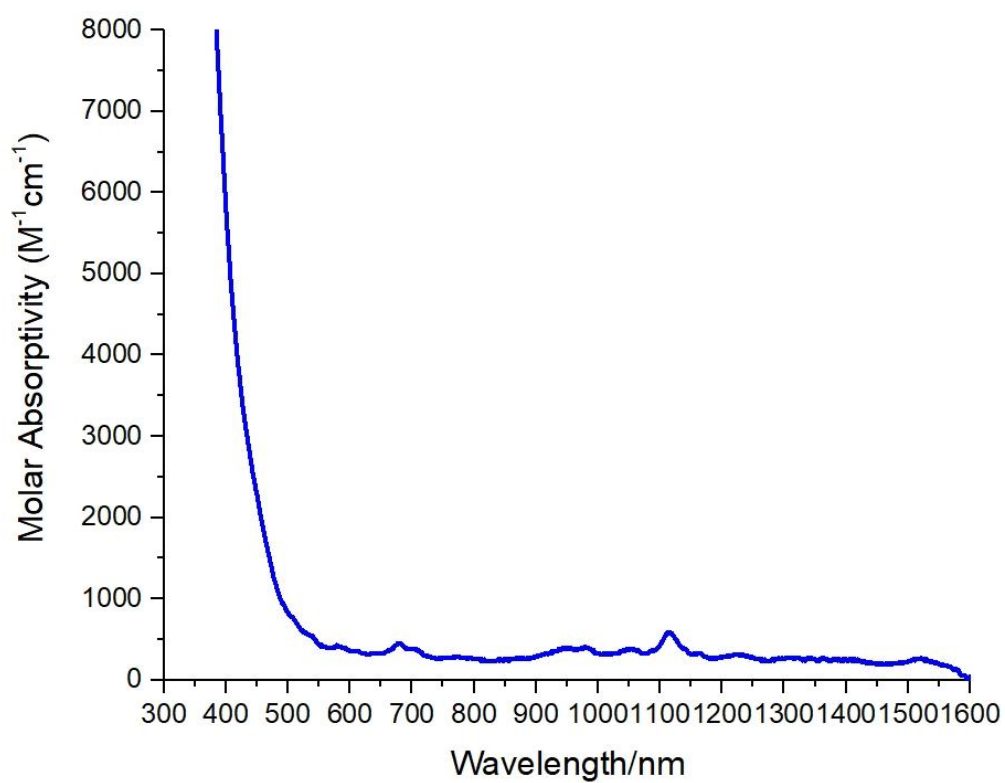

**Fig. S47.** UV-Vis spectrum of **8**.

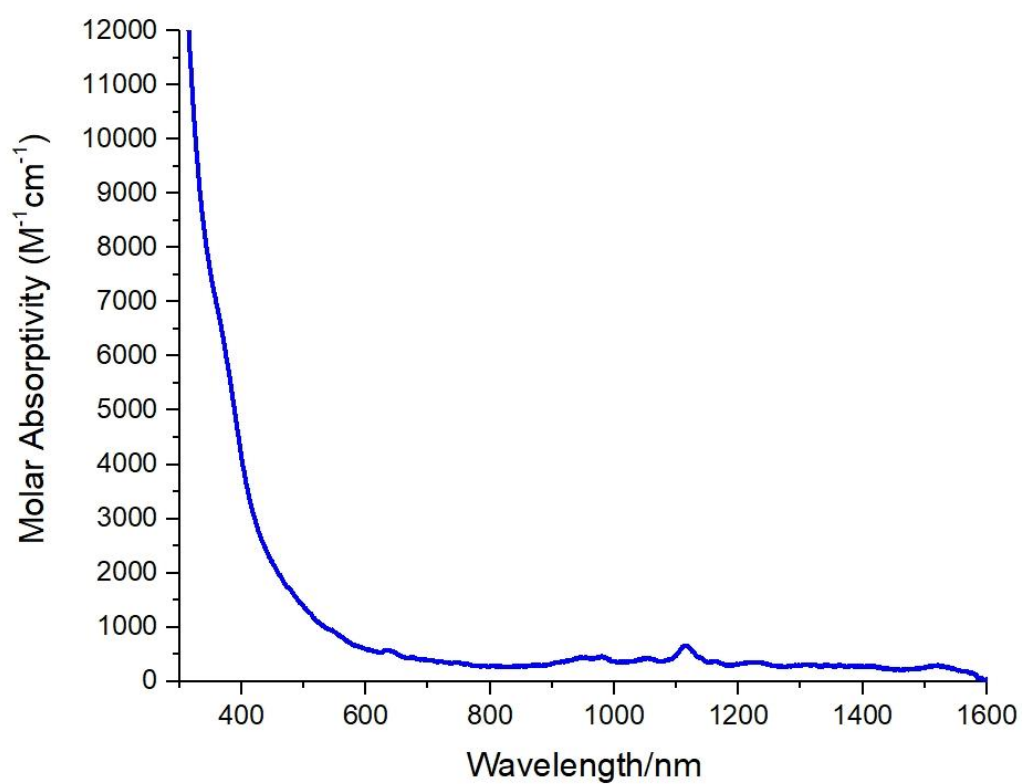

**Fig. S48.** UV-Vis spectrum of **9**.

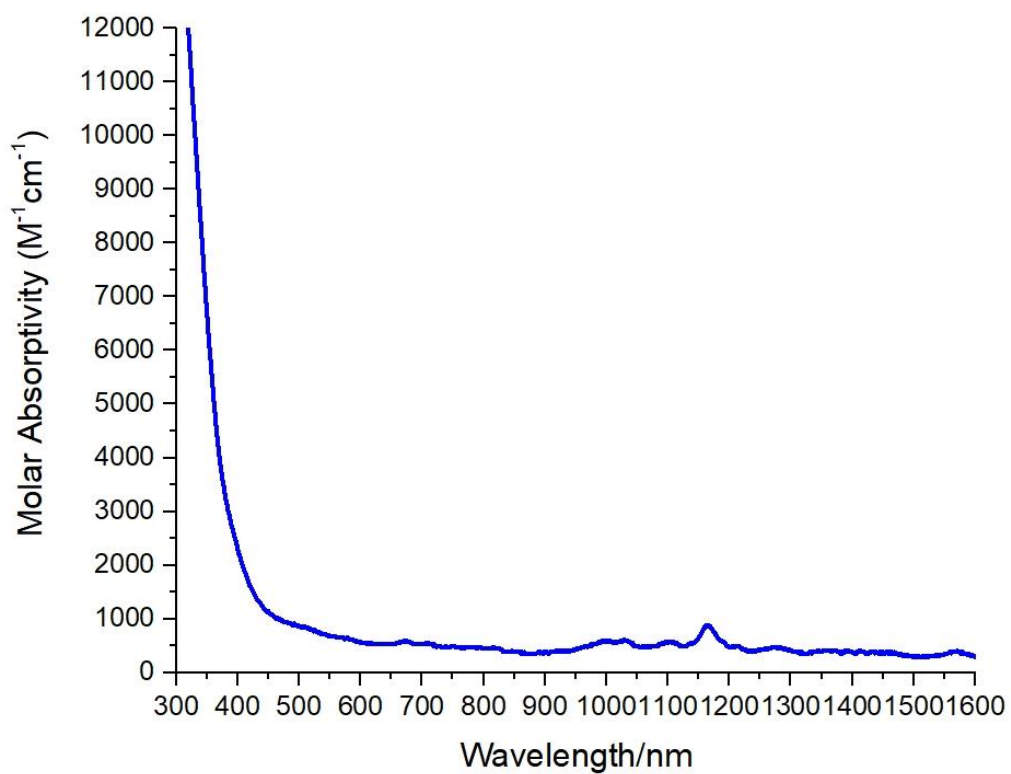

**Fig. S49.** UV-Vis spectrum of **10**.

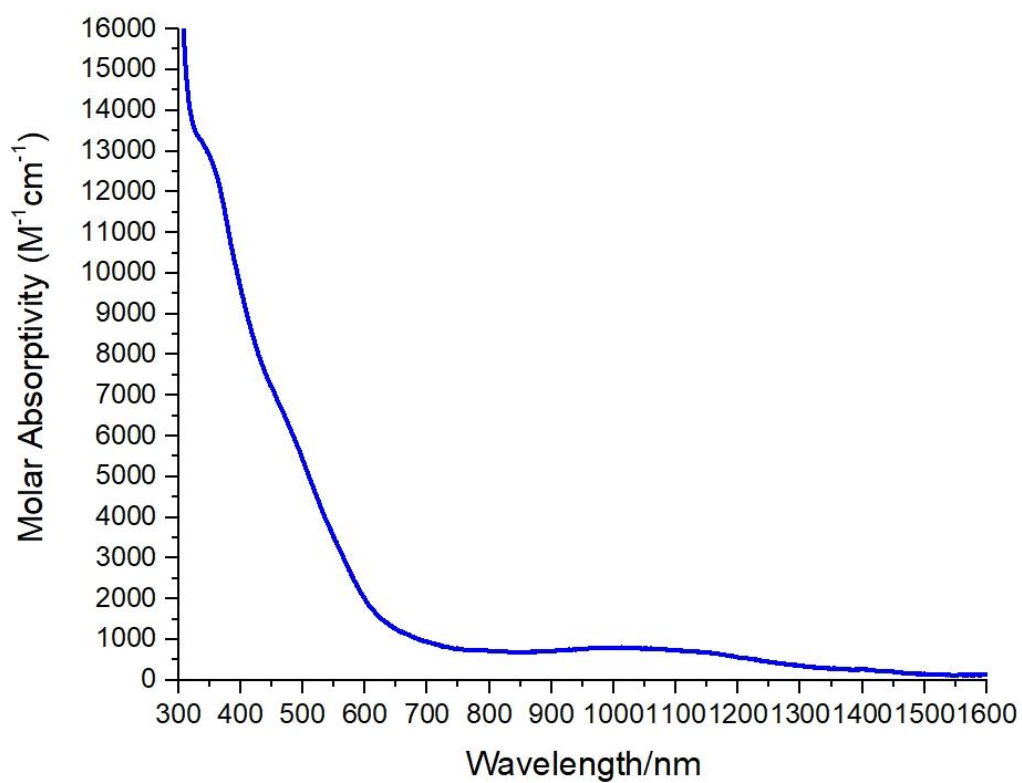

**Fig. S50.** UV-Vis spectrum of **12**.

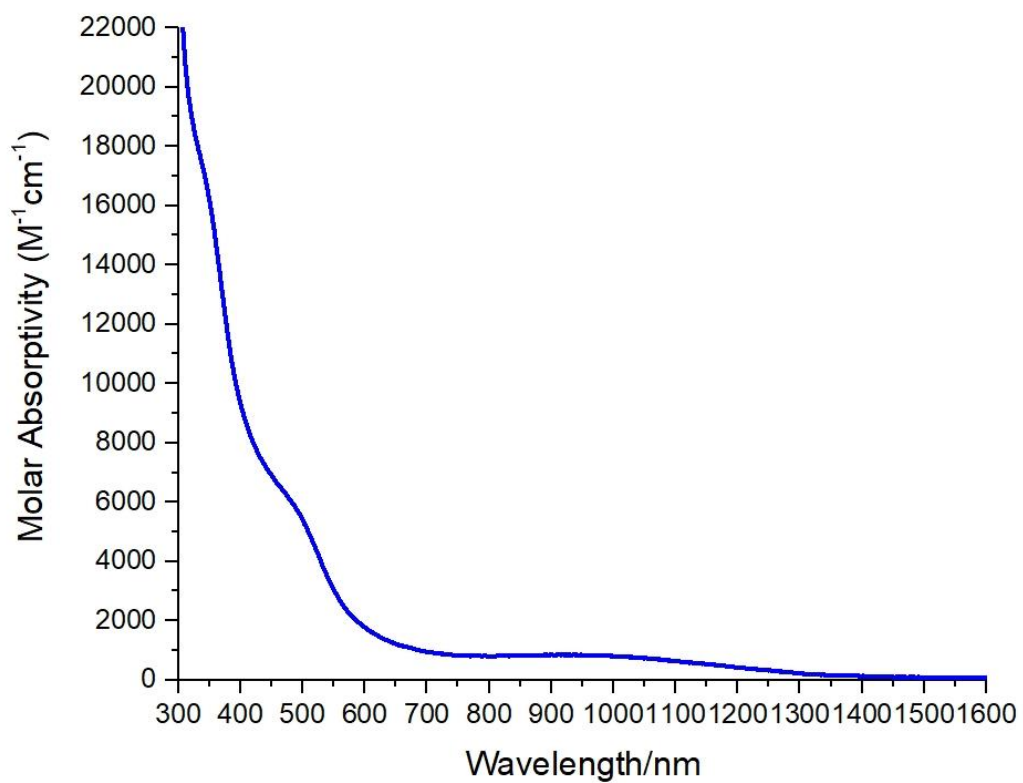

Fig. S51. UV-Vis spectrum of 13.

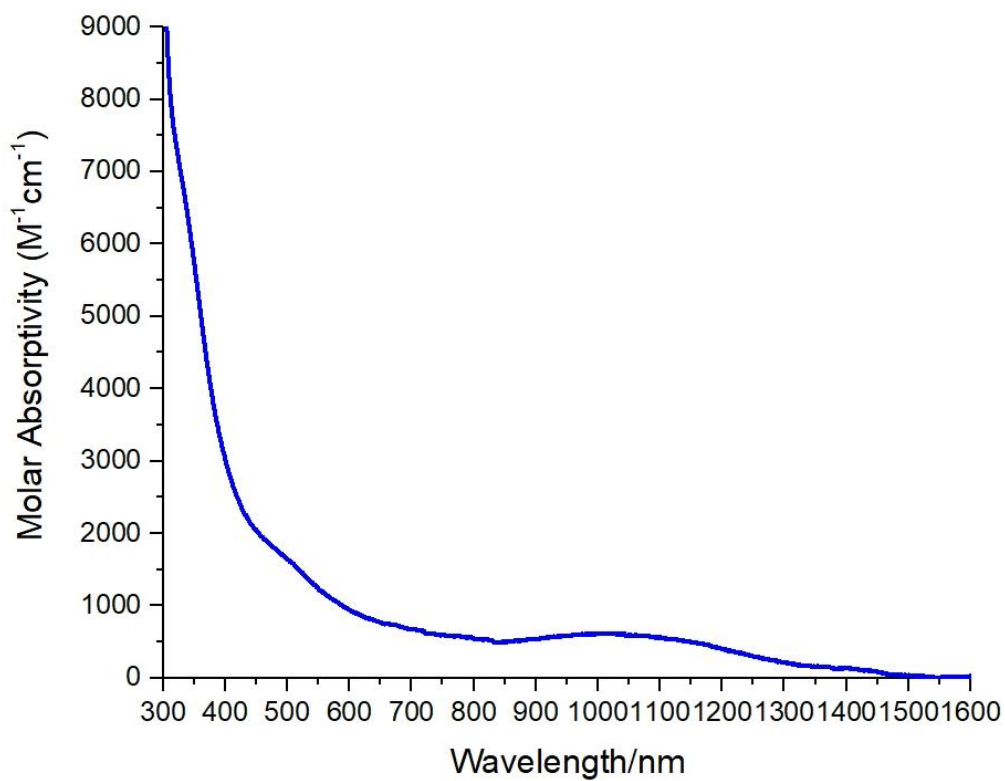

Fig. S52. UV-Vis spectrum of 14.

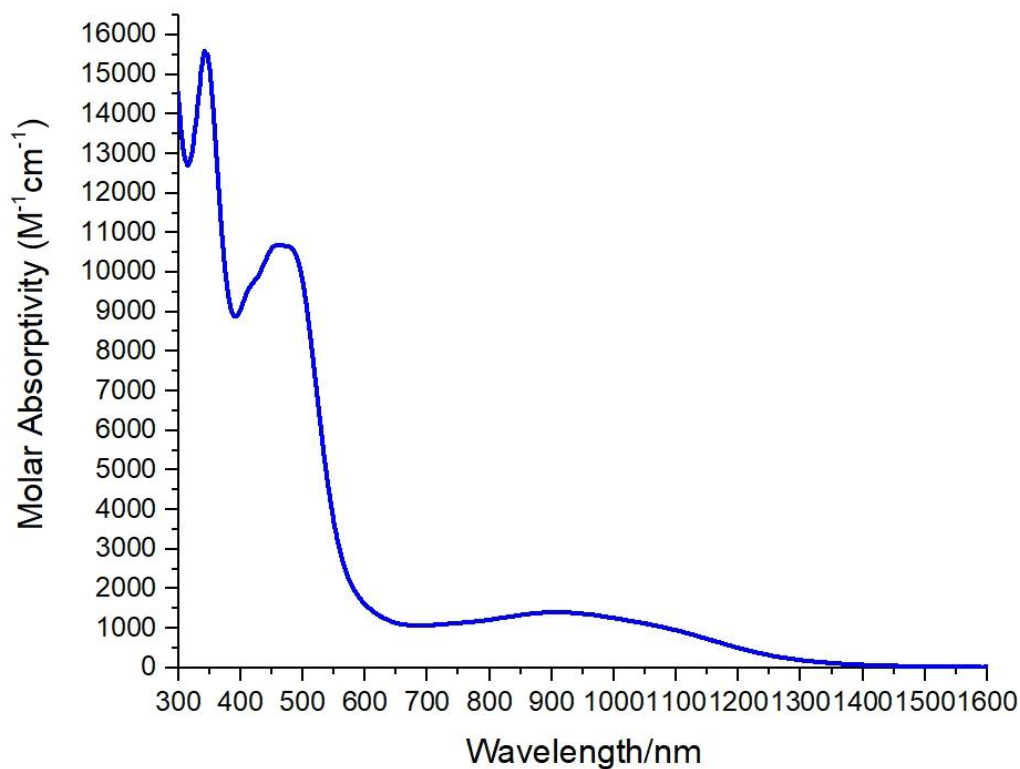

**Fig. S53.** UV-Vis spectrum of **15**.  $\lambda_{\text{max}} = 342 \text{ nm}$  ( $\epsilon = 1.56 \times 10^4 \text{ M}^{-1}\text{cm}^{-1}$ ),  $460 \text{ nm}$  ( $\epsilon = 1.06 \times 10^4 \text{ M}^{-1}\text{cm}^{-1}$ ).

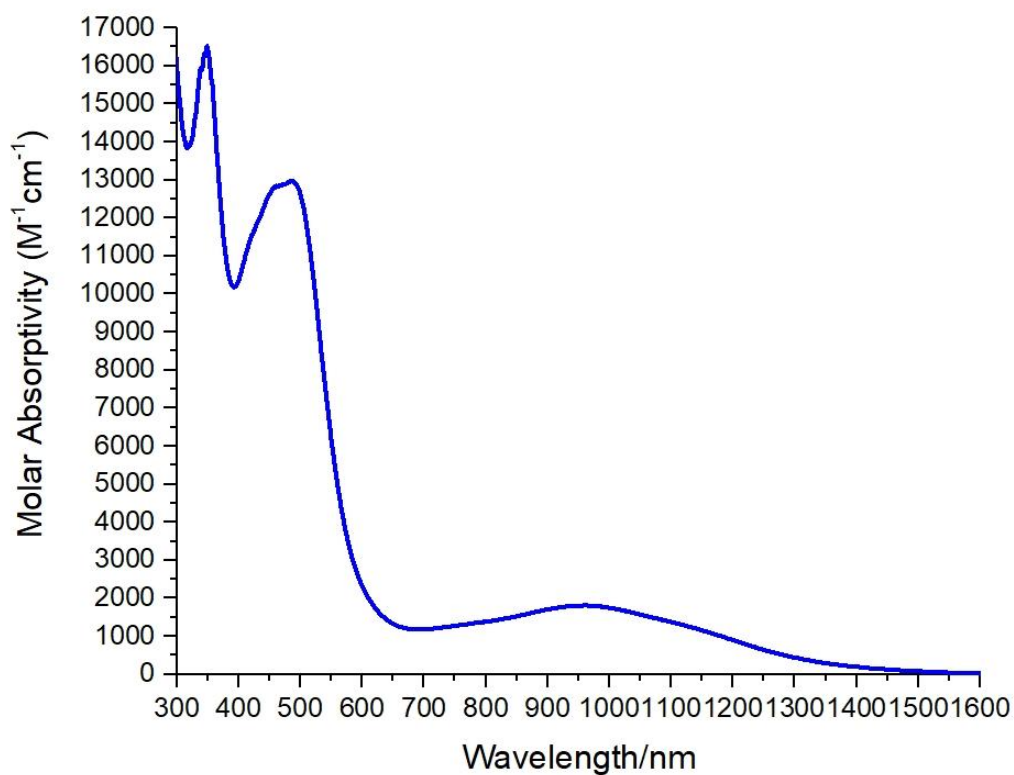

**Fig. S54.** UV-Vis spectrum of **16**.  $\lambda_{\text{max}} = 349 \text{ nm}$  ( $\epsilon = 1.65 \times 10^4 \text{ M}^{-1}\text{cm}^{-1}$ ),  $487 \text{ nm}$  ( $\epsilon = 1.30 \times 10^4 \text{ M}^{-1}\text{cm}^{-1}$ ).

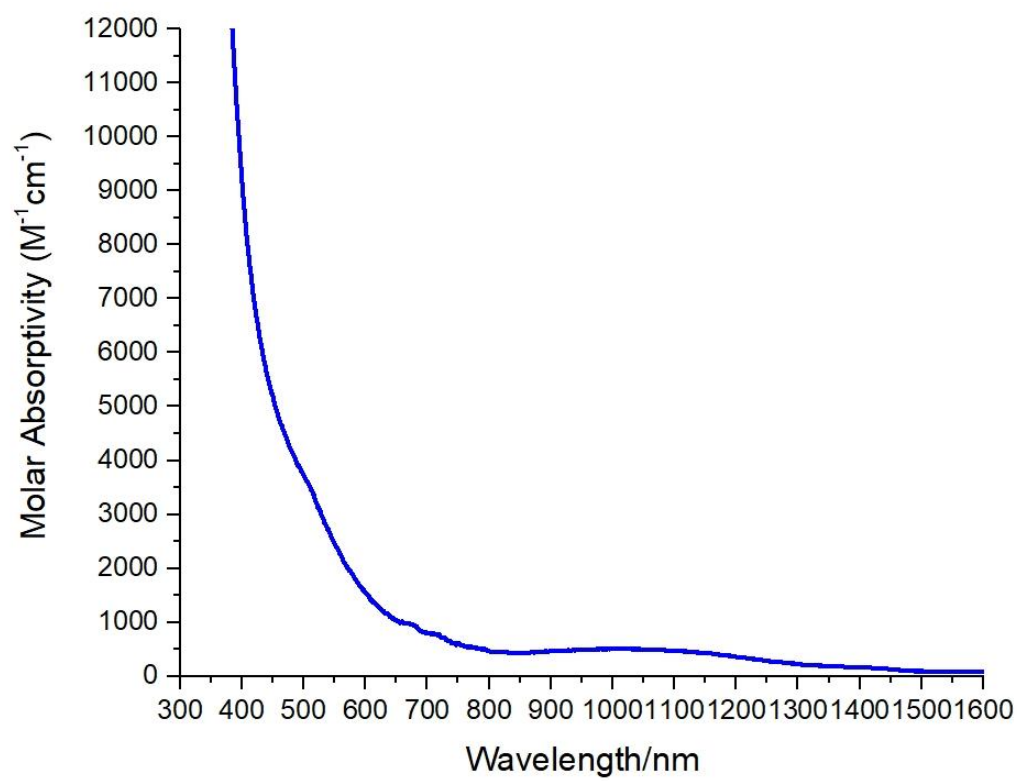

**Fig. S55.** UV-Vis spectrum of **17**.
